# Supplementary material for: First Atmospheric Aerosol Monitoring Results from Geostationary Environment Monitoring Spectrometer (GEMS) over Asia
Source: Copernicus journal article supplement (doi:10.5194/amt-2023-221), 2023-10-23
Supplement: Supplementary file 1 [file amt-2023-221-supplement.pdf]

# First Atmospheric Aerosol Monitoring Results from Geostationary Environment Monitoring Spectrometer (GEMS) over Asia

Yeseul Cho<sup>1</sup>, Jhoon Kim<sup>1</sup>, Sujung Go<sup>2,3</sup>, Mijin Kim<sup>4</sup>, Seoyoung Lee<sup>2,3</sup>, Minseok Kim<sup>1</sup>, Heesung Chong<sup>5</sup>, Won-Jin Lee<sup>6</sup>, Dong-Won Lee<sup>6</sup>, Omar Torres<sup>3</sup>, Sang Seo Park<sup>7</sup>

<sup>1</sup>Department of Atmospheric Sciences, Yonsei University, Seoul, Republic of Korea

<sup>2</sup>Goddard Earth Sciences Technology and Research (GESTAR) II, University of Maryland, Baltimore County, Baltimore, MD 21250, USA

<sup>3</sup>NASA Goddard Space Flight Center, Greenbelt, MD, USA

<sup>4</sup>Goddard Earth Sciences Technology and Research (GESTAR) II, Morgan state university, Baltimore, MD 21251, USA

<sup>5</sup>Center for Astrophysics | Harvard & Smithsonian, Cambridge, MA 02138, USA

<sup>6</sup>National Institute of Environmental Research, Incheon, Republic of Korea

<sup>7</sup>Department of Civil, Urban, Earth and Environmental Engineering, Ulsan National Institute of Science and Technology, Ulsan, Republic of Korea

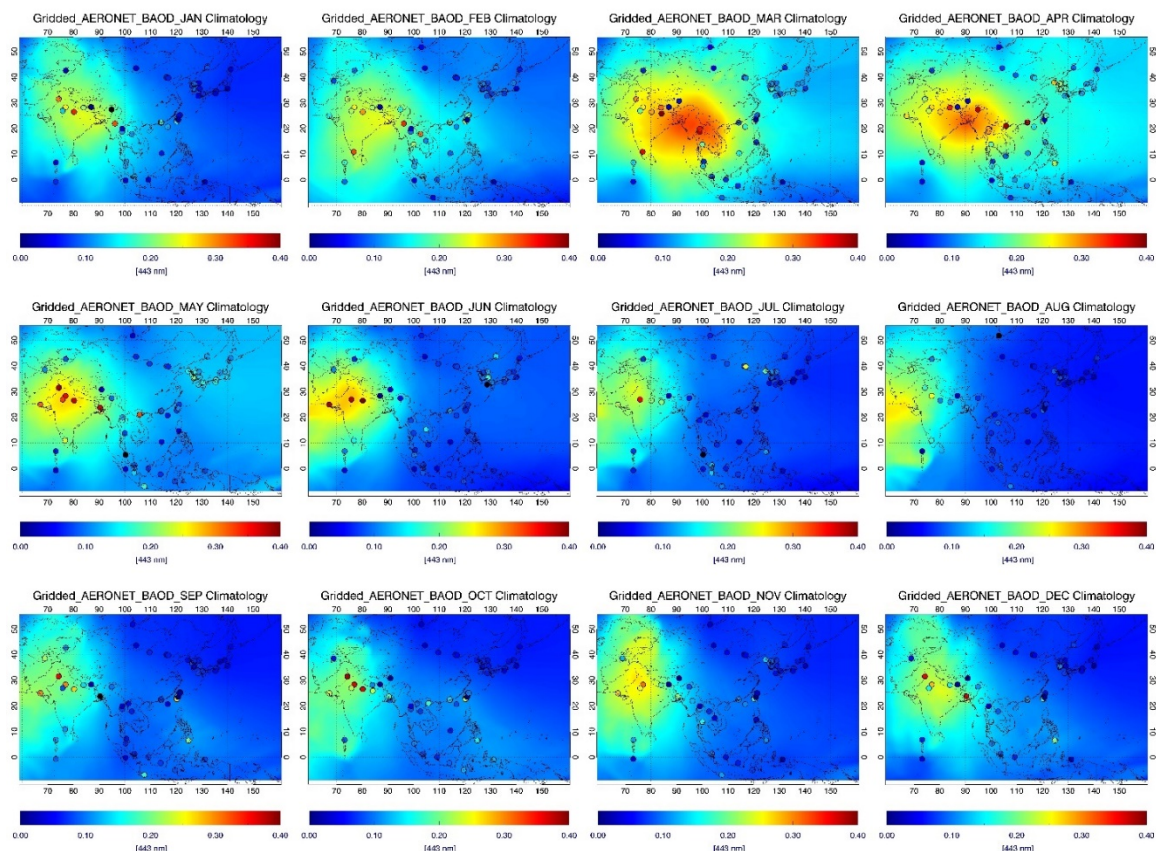

Figure S1: Monthly BAOD at 443 nm from 2-year AERONET AOD and interpolated to a  $0.1 \times 0.1^\circ$  box. The lowest fifth percentiles of the AERONET AOD 443 nm values at each AERONET site are plotted as circles for comparison.

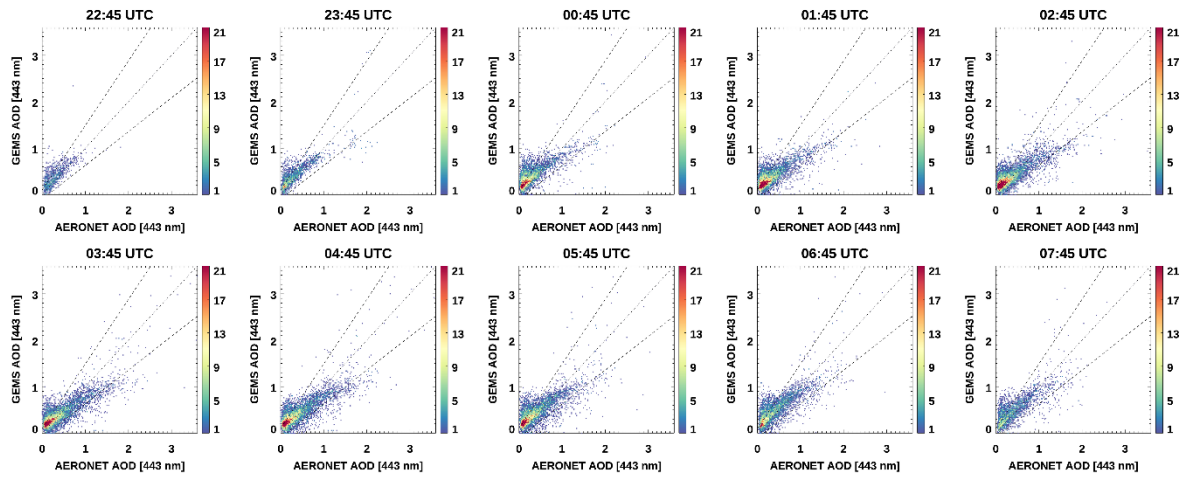

Figure S2: Hourly comparison of GEMS and AERONET AOD. The dashed lines indicate an uncertainty envelope of maximum (0.1 or 30%) in AOD. The dotted lines represent the 1:1 line.

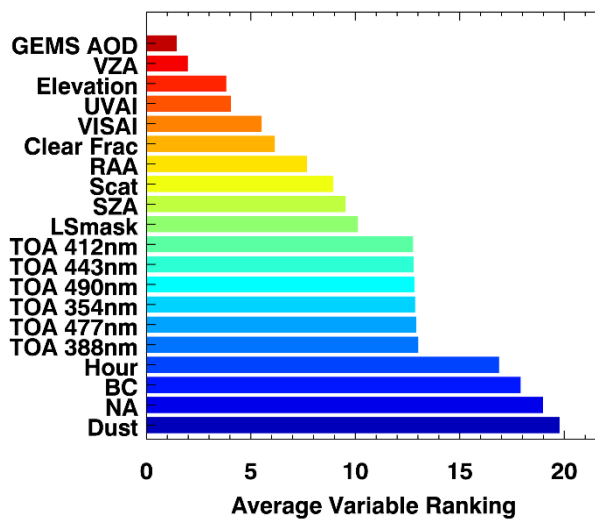

Figure S3: Average variable ranking from RF model for the post-processing correction of GEMS AOD.

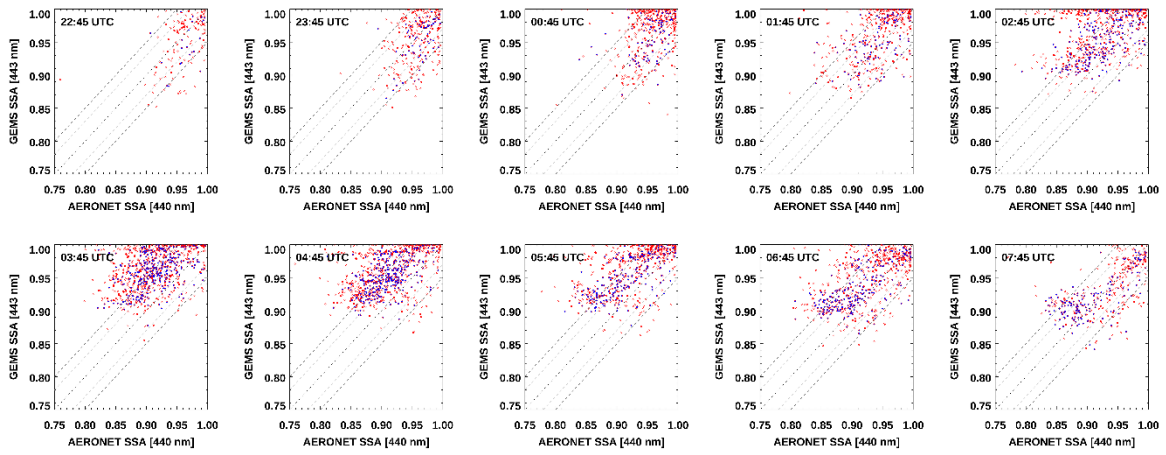

Figure S4: Hourly comparison of GEMS and AERONET SSA. The red circles represent the pixels when AOD > 0.4, and the blue circles represent the pixels when AOD > 1.0. The gray dashed lines indicate an uncertainty envelope of  $\pm 0.03$  in SSA, the black dashed lines indicate an uncertainty envelope of  $\pm 0.05$  in SSA, and the dotted lines represent the 1:1 line.

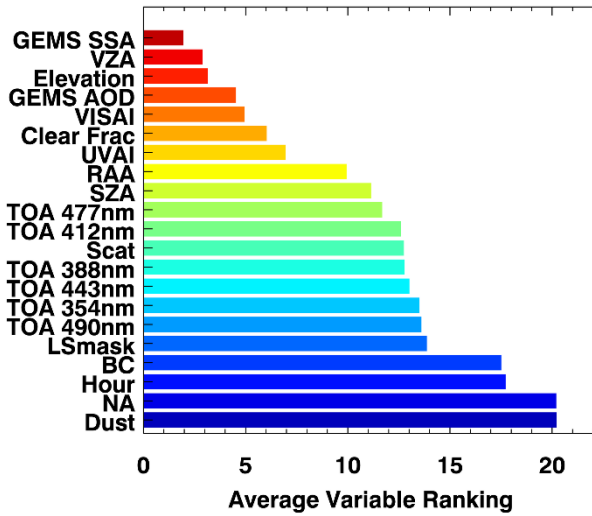

Figure S5: Average variable ranking from RF model for the post-processing correction of GEMS SSA.
