# Supplementary material for: First Atmospheric Aerosol Monitoring Results from Geostationary Environment Monitoring Spectrometer (GEMS) over Asia
Source: Copernicus journal article supplement (doi:10.5194/amt-2023-221), 2023-10-23
Supplement: Supplementary file [file amt-2023-221-RC2-supplement.pdf]

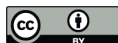

# 1 **First Atmospheric Aerosol Monitoring Results from Geostationary** 2 **Environment Monitoring Spectrometer (GEMS) over Asia**

3 Yeseul Cho<sup>1</sup>, Jhoon Kim<sup>1</sup>, Sujung Go<sup>2,3</sup>, Mijin Kim<sup>4</sup>, Seoyoung Lee<sup>2,3</sup>, Minseok Kim<sup>1</sup>, Heesung Chong<sup>5</sup>,  
4 Won-Jin Lee<sup>6</sup>, Dong-Won Lee<sup>6</sup>, Omar Torres<sup>3</sup>, Sang Seo Park<sup>7</sup>

5 <sup>1</sup>Department of Atmospheric Sciences, Yonsei University, Seoul, Republic of Korea

6 <sup>2</sup>Goddard Earth Sciences Technology and Research (GESTAR) II, University of Maryland, Baltimore County, Baltimore, MD  
7 21250, USA

8 <sup>3</sup>NASA Goddard Space Flight Center, Greenbelt, MD, USA

9 <sup>4</sup>Goddard Earth Sciences Technology and Research (GESTAR) II, Morgan state university, Baltimore, MD 21251, USA

10 <sup>5</sup>Center for Astrophysics | Harvard & Smithsonian, Cambridge, MA 02138, USA

11 <sup>6</sup>National Institute of Environmental Research, Incheon, Republic of Korea

12 <sup>7</sup>Department of Civil, Urban, Earth and Environmental Engineering, Ulsan National Institute of Science and Technology,  
13 Ulsan, Republic of Korea

14

15 *Correspondence to:* Jhoon Kim ([jkim2@yonsei.ac.kr](mailto:jkim2@yonsei.ac.kr))

16 **Abstract.** Aerosol optical properties have been provided from the Geostationary Environment Monitoring Spectrometer  
17 (GEMS). It is the world's first geostationary earth orbit (GEO) satellite instrument designed for atmospheric environmental  
18 monitoring. This study describes improvements to the GEMS aerosol retrieval algorithm (AERAOD). These include spectral  
19 binning, surface reflectance estimation, cloud masking, and post-processing. Furthermore, the study presents validation results.  
20 These enhancements are aimed at providing more accurate and reliable aerosol monitoring results for Asia. The adoption of  
21 spectral binning in the lookup table (LUT) approach reduces random errors and enhances the stability of the satellite  
22 measurements. In addition, we introduce a new high-resolution database for surface reflectance estimation based on the  
23 minimum reflectance method adapted to the GEMS pixel resolution. Monthly background aerosol optical depth (BAOD)  
24 values are used to consistently estimate the hourly GEMS surface reflectance. Advanced cloud-removal techniques are  
25 implemented to significantly improve the effectiveness of cloud detection and enhance the quality of aerosol retrieval. An  
26 innovative post-processing correction method based on machine learning is introduced to address artificial diurnal biases in  
27 aerosol optical depth (AOD) observations. This study investigates specific aerosol events. It highlights capability of GEMS to  
28 monitor and provide insights into hourly aerosol optical properties during various atmospheric events. The performance of the  
29 GEMS AERAOD products is validated against the Aerosol Robotic Network (AERONET) and Cloud-Aerosol Lidar with  
30 Orthogonal Polarization (CALIOP) data for the period from November 2021 to October 2022. The GEMS AOD demonstrates  
31 a strong correlation with the AERONET AOD ( $R = 0.792$ ). However, it exhibits bias patterns including underestimation of  
32 high AOD values and overestimation in low AOD conditions. Different aerosol types (highly absorbing fine, dust, and non-  
33 absorbing) exhibit distinct validation results. The GEMS single scattering albedo (SSA) retrievals agree well with the  
34 AERONET data within reasonable error ranges, with variations observed among the aerosol types. For GEMS AOD exceeding  
35 0.4 (1.0), 42.76% (56.61%) and 67.25% (85.70%) of GEMS SSA data points fall within the  $\pm 0.03$  and  $\pm 0.05$  error bounds,  
36 respectively. Model-enforced post-processing correction improved the GEMS AOD and SSA performances, thereby reducing  
37 the diurnal variation in biases. The validation of the GEMS aerosol layer height (ALH) retrievals against the CALIOP data  
38 demonstrates a good agreement, with a mean bias of  $-0.225$  km, and 55.29% (71.70%) of data within  $\pm 1$  km (1.5 km).

39



## 40 1 Introduction

41 The regional and global monitoring of aerosol optical properties (AOPs) was conducted using satellite measurements. Low  
42 earth orbit (LEO) instruments such as the Advanced Very High-Resolution Radiometer (AVHRR), Moderate Resolution  
43 Imaging Spectroradiometer (MODIS), Multiangle Imaging Spectro Radiometer (MISR), Visible Infrared Imaging Radiometer  
44 Suite (VIIRS), and Sea-viewing Wide Field-of-view Sensor (SeaWiFS), can provide daily aerosol properties for the global  
45 domain (Hsu et al., 2004, 2006, 2017, 2019; Jackson et al., 2013; Jethva et al., 2007; Levy et al., 2013; Lyapustin et al., 2018;  
46 Martonchik et al., 2009; Remer et al., 2005). While significant diurnal variations in AOPs have been observed at daily and  
47 local scales, emphasizing the importance of geostationary satellite measurements for both air quality and climate studies, the  
48 temporal resolutions of LEO satellites (typically ~~1-day~~) have limitations in investigating the diurnal variation and  
49 transboundary transportation of aerosols (Lennartson et al., 2018; Zhang et al., 2018). Geostationary earth orbit (GEO)  
50 instruments such as the Advanced Baseline Imager (ABI), Geostationary Ocean Color Imager (GOCI), GOCI-II,  
51 Meteorological Imager (MI), and Advanced Himawari Imager (AHI), have contributed to the operational monitoring of the  
52 continuous spatio-temporal variations in AOPs at continental spatial scales with temporal resolutions of minutes to hours using  
53 the visible and near-infrared channel (Choi et al., 2018; Kim et al., 2016; Kondragunta et al., 2020; Lee et al., 2023; Yoshida  
54 et al., 2018).

55 Besides spatial and temporal resolutions, another critical consideration for satellite aerosol retrievals is channel specification.  
56 Every above-mentioned instrument except GOCI-II uses only visible (Vis) and near-infrared channels. However, near-  
57 ultraviolet (UV) spectral region uniquely leverages its sensitivity to aerosol absorption. Thereby, it provides valuable insights  
58 into aerosol optical properties. A major advantage of near-UV measurements is that the surface reflectance in the near-UV  
59 region is darker than that in the visible region. This enables the derivation of AOPs over a bright surface. In addition,  
60 observations in the UV region are sensitive to aerosols' radiative absorption and aerosol layer height (ALH) information  
61 because Rayleigh scattering is reduced below the aerosol layer owing to aerosol attenuation (Kayetha et al., 2022; Torres et  
62 al., 2005).

63 The Ozone Monitoring Instrument (OMI) serves as an example of an LEO sensor that utilizes UV wavelengths for aerosol  
64 retrievals. It has measured radiances in the 270–500 nm spectral range and offered global coverage at a spatial resolution of  
65  $13 \times 24$  km at nadir since 2004 (Levelt et al., 2018). OMI employs two aerosol algorithms. The first one, OMAERO (Curier  
66 et al., 2008), developed and maintained by the Royal Netherlands Meteorological Institute (KNMI), is a multiwavelength  
67 algorithm that relies on spectral fitting procedures to derive aerosol properties. The other is the OMI near-UV aerosol retrieval  
68 algorithm (OMAERUV). It focuses on retrieving key atmospheric aerosol properties including the aerosol optical depth (AOD),  
69 single scattering albedo (SSA), and absorbing aerosol index (AI) (Torres et al., 2007).

70 The OMAERUV algorithm has its heritage in the Total Ozone Mapping Spectrometer (TOMS) aerosol retrieval algorithm. It  
71 uses reflectance measurements at 354 and 388 nm to determine the AOD and SSA using the two channel inversion method  
72 (Torres et al., 2002; Torres et al., 2007). The global statistics reported by Ahn et al. (2014) indicate a correlation coefficient (R)  
73 of 0.81. However, OMAERUV provides a lower R (0.63) over Central and East Asia (Zhang et al., 2015). In addition, the  
74 Tropospheric Monitoring Instrument (TROPOMI) aerosol algorithm (TropOMAER) was developed as an adaptation of  
75 OMAERUV. A comparison between Aerosol Robotic Network (AERONET) and TropOMAER AOD at 12 locations yielded  
76 an R of 0.82 and a root mean square error (RMSE) of 0.19 (Torres et al., 2020).

77 The Geostationary Environment Monitoring Spectrometer (GEMS) is the first UV-Vis hyperspectral satellite instrument in a  
78 GEO. It is onboard the Geostationary Korea Multi-Purpose Satellite-2B (GEO-KOMPSAT-2B or GK-2B). GEMS was  
79 launched on February 19, 2020 (Kim et al., 2020). The objective of the GEMS mission is to monitor the hourly air quality in  
80 Asia ( $5^{\circ}\text{S}$ – $45^{\circ}\text{N}$ ,  $75$ – $145^{\circ}\text{E}$ ) with a fine spatial resolution ( $3.5 \times 7.7$  km<sup>2</sup> at Seoul, South Korea). GEMS provides hyperspectral

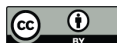

81 measurements covering 300–500 nm at a spectral resolution of 0.6 nm. Considering the solar zenith angle (SZA), the GEMS  
82 east–west scan profiles are between morning, noon, and afternoon following the sunlit part of the globe to cover the full field  
83 of regard (FOR). The GEMS aerosol retrieval (AERAOD) algorithm is based on OMAERUV algorithm and the optimal  
84 estimation (OE) method by finding the optimized values of AOD, SSA, and ALH from GEMS measurements at six  
85 wavelengths (354, 388, 412, 443, 477, and 490 nm). In order to overcome the challenge posed by the limited degree of freedom  
86 for signal in the GEMS wavelength range, this algorithm employs the two channel inversion method that is used in the  
87 OMAERUV algorithm to retrieve AOD and SSA. Subsequently, these retrievals are used as the first guesses for the OE method  
88 (Kim et al., 2018). The six wavelengths in the UV-Vis region contain information regarding the aerosol absorption in the UV  
89 region and the absorption bands of the oxygen dimer ( $O_2-O_2$ ) at 477 nm. This method was tested using the OMI Level 1 data  
90 and was used to derive key aerosol parameters, including AOD, SSA, ALH, UV, and VisAI (Kim et al., 2018; Go et al., 2020a,  
91 2020b). Kim et al. (2018) reported that a comparison between AERONET and GEMS AOD at 26 locations in Asia yielded an  
92 R of 0.71 and a RMSE of 0.46. The percentage of GEMS SSA within the expected error range of the AERONET inversion  
93 data ( $\pm 0.03$ ) was denoted by 27.54%. Spectral variations of aerosol absorption in the UV-Vis region were investigated by Go  
94 et al. (2020a) and it is applied to GEMS aerosol algorithm. The GEMS AOD demonstrated a strong correlation with the  
95 AERONET AOD ( $R = 0.847$  and  $RMSE = 0.285$ ) and the percentage of GEMS SSA within the expected error of  $\pm 0.03$   
96 increased to 41.64% (Go et al., 2020a). To improve the accuracy of GEMS aerosol retrieval, the use of cloud mask information  
97 and total dust confidence index from MODIS IR channels was tested for synergy (Go et al., 2020b).

98 However, as the testbed for the GEMS algorithm was on the LEO platform, the time-dependent retrieval bias had not been  
99 observed previously. The diurnal variations in satellite-retrieved AOPs may differ from the actual diurnal variations in the  
100 AOPs. This discrepancy can be attributed to the different patterns of bias observed over time among the different geostationary  
101 satellites and retrieval algorithms (Choi et al., 2018; Lennartson et al., 2018; Wei et al., 2019; Zhang et al., 2020). This diurnal  
102 bias in AOP measurements can originate from various factors such as errors in the surface reflectance assumption used in the  
103 retrieval algorithm, calibration issues in the Level 1 data, or the presence of short light paths at noon (Ceamanos et al., 2023).

104 To address this issue, an empirical AOD bias-correction algorithm was developed. This algorithm utilizes the lowest AOD  
105 values observed within a 30-day period in conjunction with the background AOD to obtain a smoothed bias curve for each  
106 pixel of the ABI AOD data (Zhang et al., 2020). This approach helps mitigate the impact of diurnal bias in satellite AOD  
107 retrievals to improve the accuracy by removing artifacts from the retrieval. By applying bias correction methods, more reliable  
108 diurnal variations in AOD can be explained. Beyond traditional statistical methods, bias correction methods based on machine  
109 learning have started to be proposed. Model-enforced post-processing correction involves the use of a machine learning-based  
110 model to predict errors in conventional aerosol retrievals (Lipponen et al. 2021, 2022a, 2022b). This method was trained to  
111 learn the relationship between the input parameters of the satellite measurements and the associated retrieval errors. This  
112 approach provides a practical and effective method to enhance the accuracy of aerosol retrieval without requiring extensive  
113 modifications to existing retrieval algorithms. It leverages machine learning capabilities to improve the reliability and precision  
114 of hourly aerosol measurements obtained from GEO satellite observations.

115 In this paper, we report the first aerosol monitoring results including the AOD, SSA, and ALH derived using the GEMS aerosol  
116 retrieval algorithm. The remainder of this paper is organized as follows: Section 2 of the paper describes the GEMS data and  
117 the aerosol retrieval algorithm. It also highlights the algorithm updates after the GEMS in-orbit test (IOT) period. Section 3  
118 discusses post-process correction for near-real-time retrieval. Section 4 discusses the GEMS aerosol monitoring results for  
119 dust, biomass burning, and absorbing aerosol events over Asia. Section 5 presents an evaluation of the retrieved GEMS AOD,  
120 SSA, and ALH retrievals against AERONET and CALIOP data. Section 6 presents the summary and future work.

121



122 2 Data and GEMS aerosol algorithm

123 2.1 Data description

124 2.1.1 GEMS normalized radiance

125 GEMS operation process provides Level-1C (L1C) dataset in purpose of improving the efficiency of Level 2 algorithm process  
126 by combining parameters dispersed in different files into one file. In this study, The aerosol retrieval algorithm used radiances  
127 only with the quality flags of 0 (Good) or 2 (interpolated radiances), determined by the “bad\_pixel\_mask” variable. Rather  
128 than GEMS irradiance, we used the KNMI solar reference spectrum to calculate the GEMS-normalized radiance (Dobber et  
129 al., 2008). The GEMS irradiance is within the range of -5% to -20% compared with the KNMI solar reference spectrum. It still  
130 requires further improvement in L1 processing. To account for the spectral characteristics of the instrument, the KNMI solar  
131 reference spectrum is convolved with the GEMS spectral response function. GEMS-measured irradiances are planned to be  
132 employed when an improved version of the Sun L1C product is released by the National Institute of Environmental Research  
133 (NIER).

134 Normalized radiances are defined in the following equation:

$$135 \quad N_{\lambda} = \frac{I_{\lambda}}{ESD \times E_{\lambda}} \quad (1)$$

136 where  $I$ ,  $E$ ,  $ESD$ , and  $\lambda$  are the GEMS radiance, KNMI solar reference spectrum, earth–sun distance correction factor, and  
137 wavelength (354, 388, 412, 443, 477, and 490 nm), respectively. The spectral radiance and irradiance were spectrally binned  
138 and averaged within  $\pm 2.2$  nm from each wavelength to enhance measurement signals. Additionally, earth–sun distance  
139 correction was used to calculate the normalized radiance.

140

141 2.1.2 AERONET

142 AERONET is a global ground-based remote-sensing network that measures aerosol optical, microphysical and radiative  
143 properties (Giles et al., 2019; Holben et al., 1998; Sinyuk et al., 2020). The measurement systems use Cimel sun photometers  
144 to measure the solar irradiances at eight wavelengths ranging from 340 to 1020 nm and sky radiances at four wavelengths  
145 ranging from 440 to 1020 nm. The AERONET data provide global aerosol information including the spectral AOD and  
146 inversion products such as the SSA, aerosol size distribution, and refractive index. The uncertainties in AODs are wavelength-  
147 dependent. It is approximately 0.01 (Vis) to 0.02 (Near-UV) in direct sun measurements (Dubovik et al., 2002). The  
148 uncertainties of SSA are  $\pm 0.03$  when AOD exceeds 0.4 at 440 nm (Dubovik et al., 2002). For the evaluation of GEMS AOD  
149 and SSA data from November 2021 to October 2022, we used AERONET V3 Level 1.5 data for AOD and AERONET V3  
150 Level 1.5 hybrid inversion data for SSA from all sites within the entire GEMS domain.

151

152 2.1.3 CALIOP

153 The CALIOP instrument is a two-wavelength polarization-sensitive lidar on the Cloud-Aerosol Lidar and Infrared Pathfinder  
154 Satellite Observations (CALIPSO) satellite. It was launched on April 28, 2006 (Winker et al., 2009). CALIOP monitors the  
155 global vertical profiles of aerosols and clouds by measuring three signals: the backscatter intensity at 1064 nm and the  
156 orthogonally polarized components of the backscattered signal at 532 nm.

157 Quantitative scattering information from CALIOP instruments was used as reference data for validating the ALH obtained  
158 from passive sensors (Xu et al., 2017; Xu et al., 2019; Nanda et al., 2020; Park et al., 2023). We used CALIPSO Lidar Level  
159 2 Aerosol Profile V3-41 data to validate the GEMS ALH. CALIOP profiles of the extinction coefficient ( $\beta_{ext}$ ) at the 532 nm



160 channel were utilized to calculate the CALIOP ALH using the following equation:

$$161 \quad Z_{aer} = \sum_{i=1}^n H(i) \left[ \frac{\beta_{ext}(i)}{\sum_{i=1}^n \beta_{ext}(i)} \right] \quad (2)$$

162 where  $\beta_{ext}(i)$  is the CALIOP profile of the 532 nm extinction coefficient at height  $H(i)$  and  $n$  is the number of layers.

163

## 164 2.2 GEMS AERAOD retrieval algorithm

### 165 2.2.1 Aerosol optical properties retrieval algorithm for GEMS

166 The GEMS AERAOD algorithm produces AOD, SSA, and ALH via the OE method. The preliminary GEMS AERAOD was  
167 developed using OMI L1B normalized radiance (Kim et al., 2018; Go et al., 2020a, 2020b). After the launch, the algorithm  
168 was tested using the GEMS observation during the IOT period, and several parts of the algorithm were updated. This section  
169 briefly describes the GEMS AERAOD algorithm; AERAOD L2 data; and updates including the Look-Up Table (LUT), cloud  
170 masking procedure, surface reflectance estimation, and post-processing after the IOT period. The general flow of the GEMS  
171 AERAOD retrieval algorithm is illustrated in Figure 1.

172 GEMS algorithm adopts a LUT approach to optimize computation efficiency. The LUT is calculated assuming AOPs of three  
173 aerosol types by using a radiative transfer model (RTM), the Vector Linearized Discrete Ordinate Radiative Transfer code  
174 (VLIDORT) (Spurr, 2006). The AOPs of Highly absorbing fine (HAF), Dust, and Non-absorbing (NA) are integrated from  
175 AERONET inversion data and are applied for the RTM simulation. The details of the updated LUT are described in section  
176 2.1.2. The preliminary algorithm used the OMI climatology Lambertian equivalent reflectance (OMLER v003) datasets as  
177 surface reflectance, but for the GEMS AERAOD algorithm, GEMS L2 surface reflectance at 354, 388, 412, 443, 477, and 490  
178 nm are obtained by minimum reflectance method. The details of surface reflectance estimation are described in section 2.1.3.

179 The GEMS AERAOD provides UV and visible (Vis) AI to indicate the qualitative radiative absorptivity and particle size  
180 information, respectively (Torres et al., 2002). The GEMS UVAI and VisAI were calculated using the following equations:

$$181 \quad AI = -100 \left[ \log \left( \frac{N_{\lambda_1}}{N_{\lambda_2}} \right)_{meas} - \log \left( \frac{N_{\lambda_1}(LER_{\lambda_1})}{N_{\lambda_2}(LER_{\lambda_2})} \right)_{calc} \right] \quad (3)$$

182 where  $N_{\lambda_1}$  and  $N_{\lambda_2}$  are the normalized radiances at the 354/388 (477/490) nm wavelength pair for UVAI and VisAI,  
183 respectively. The subscripts *meas* and *calc* represent the measured and calculated normalized radiances, respectively.

184 Aerosol type among HAF, dust and NA is selected using the UVAI and VisAI. The NA type was detected by a negative UVAI  
185 value. The dust and HAF types were distinguished by VisAI. When both AIs were positive, the dust type was selected. Sun  
186 glint and cloud masking leave only the pixels appropriate for aerosol retrieval. The glint mask is set for glint angles less than  
187 35°. The details of the cloud-masking procedure are described in Section 2.1.4. The *a priori* states of AOD and SSA at 443 nm  
188 were obtained by two-channel inversion with neighboring wavelengths (354 and 388 nm) over both land and ocean. **The**  
189 **assumption was that the climatology of ALH was based on CALIOP.** The *a priori* states of the AOD and SSA were supplied to  
190 solve the Levenberg–Marquardt equation. The optimal ALH was retrieved by fitting the normalized radiance between the  
191 measured and calculated values for the OE routine. The details of the GEMS aerosol inversion procedure are described by Kim  
192 et al. (2018).

193 To improve the accuracy of near real-time GEMS AOD retrieval, a model-enforced post-process correction step was  
194 implemented using a random forest (RF) model. By combining GEMS aerosol retrieval with this post-processing correction  
195 model, more reliable and accurate near real-time AOD estimates can be obtained.



196

### 197 2.1.2 LUT calculation

198 In this study, the AOPs were ~~considered~~ as described by Kim et al. (2018) and Go et al. (2020a). However, the dimensions of  
199 ~~the LUT varied (as shown in Table 1) compared~~ with Kim et al. (2018). The nodes for the 412 nm SSA node for NA were  
200 added. In addition, the nodes for AOD in the LUT were extended to include the values at 5.0 and 10.0 ~~because the previous~~  
201 ~~maximum node was 3.6. These modifications~~ enable the retrieval of exceptionally severe aerosol events during GEMS  
202 observations. The preliminary GEMS AERAOD retrieval algorithm utilized the normalized radiance at six specific  
203 monochromatic wavelengths (354, 388, 412, 443, 477, and 490 nm). However, satellite measurements averaged over a specific  
204 wavelength range produce more stable values than measurements obtained at individual monochromatic wavelengths. ~~This~~  
205 ~~increased stability is attributed to~~ the averaging of random errors (i.e., instrument noise). Consequently, a spectral-binning  
206 LUT approach was employed to reduce random errors and improve the stability of the measurements. This allowed for more  
207 reliable and consistent observations. Compared with monochromatic wavelengths, the spectral binning method is  
208 computationally intensive. Therefore, the calculations were performed using the Mie theory without considering the non-  
209 sphericity of the dust. The process of spectral binning LUT in the GEMS aerosol algorithm involves three steps: 1) A reference  
210 spectrum is generated using an RTM, which provides a spectral interval of 0.1 nm. 2) The calculated spectrum is convolved  
211 with the GEMS spectral response function and resampled to the target spectral grids with a resolution of 0.2 nm. (Kang et al.,  
212 2020). 3) The resampled spectrum is averaged at intervals of  $\pm 2.2$  nm at six central wavelengths (354, 388, 412, 443, 477, and  
213 490 nm) and saved in the LUT. ~~This range~~ is selected to account for the calculation capacity and reduce the impact of random  
214 errors. During the retrieval process, the GEMS L1C normalized radiances after being averaged at intervals of  $\pm 2.2$  nm at six  
215 central wavelengths are compared with the calculated spectrum in the LUT. By these steps, the spectral binning LUT aims to  
216 generate more stable retrieval results for aerosol properties.

217

### 218 2.1.3 Surface reflectance estimation

219 In this study, several improvements were introduced. These include an updated GEMS surface reflectance estimation. ~~The~~  
220 ~~preliminary GEMS AERAOD retrieval algorithm used the OMI surface reflectance climatology data product OMLER v003~~  
221 ~~(Kleipool et al. 2008), with a spatial resolution of  $0.5 \times 0.5^\circ$ . The limitation of the previous surface reflectance data was its~~  
222 ~~coarse spatial resolution compared with that of GEMS pixels. This resulted in discontinuities in the GEMS AOPs owing to~~  
223 ~~spatial resolution differences. To address this limitation, the updated GEMS surface reflectance has a finer spatial resolution~~  
224 ~~( $0.1 \times 0.1^\circ$ ). This closely aligns with the GEMS pixel resolution. This enhancement enables a more accurate aerosol retrieval~~  
225 ~~at the pixel level. The compiled hourly surface reflectance indirectly reflects the bidirectional reflectance distribution function~~  
226 ~~(BRDF) effect. In addition, a new hourly surface reflectance database was generated using the minimum reflectance method~~  
227 ~~based on the GEMS data. The algorithm adopts the climatological minimum reflectance method for each pixel over a  $\pm 15$ -day~~  
228 ~~window spanning a period of two years. Several tests were performed to evaluate different time windows and methods for~~  
229 ~~constructing accurate surface reflectance. These tests evaluated the effectiveness of using a  $\pm 15$ -day window as well as~~  
230 ~~alternative options such as a previous 30-day window. In addition, different methods including the minimum reflectance and~~  
231 ~~second minimum reflectance approaches were evaluated to determine the most suitable one for generating appropriate surface~~  
232 ~~reflectance values (not included in this study).~~

233 ~~The background AOD (BAOD) was considered in the retrieval algorithm.~~ The BAOD represents the baseline level of AOD  
234 that is consistently present in a region. Recent studies have shown that incorporating BAOD into an algorithm can reduce the  
235 uncertainty associated with satellite-based AOD ~~remote sensing~~ (Kim et al., 2014, 2021). Zhang et al. (2016) estimated BAOD  
236 as the lowest fifth percentile of AERONET AOD over a two-year period and improved the performance of the VIIRS aerosol



237 algorithm. It has been observed that Asia experiences relatively high BAOD values with seasonal variation. For example, at  
238 the Dhaka University site, the monthly BAOD over the past two years varied from a minimum of 0.124 in August to a  
239 maximum of 0.685 in April. Therefore, considering the seasonal variation in BAOD for atmospheric correction can help  
240 mitigate the uncertainty in satellite-derived AOD retrieval, particularly over Asia. The monthly BAODs were calculated using  
241 the following equation for each  $0.1 \times 0.1^\circ$  box from November 2020 to October 2021:

$$242 \quad \tau_{grid,b,m}(lat, lon) = \sum_i W_i \tau_{b,m,i}, \sum_i W_i \quad (4)$$

243 where  $\tau_{grid,b,m}(lat, lon)$  is the interpolated BAOD 443 nm at  $(lat, lon)$  in month  $m$ .  $W_i$  is the inverse distance weighting  
244 function, which is defined as  $e^{-d_i(lat,lon)/d_0}$ .  $d_i(lat, lon)$  is the distance between the AERONET site and GEMS pixel and  $d_0$   
245 is a constant, respectively.  $\tau_{b,m,i}$  is the lowest fifth percentile of AERONET AOD over a two-year period at AERONET site  $i$   
246 in month  $m$ .

247 **Figure S1** shows the monthly BAOD obtained based on the AERONET AOD data. Additionally, the fifth percentiles of the  
248 AERONET AOD 443 nm values at each AERONET site are plotted as circles for reference. It is evident that regions such as  
249 India exhibit a high BAOD of over approximately 0.15 throughout the year, regardless of the month. However, seasonal  
250 variations in BAOD occur over the Indochinese Peninsula, Korea, and China. These areas experience heavy pollution from  
251 biomass burning during the dry season and dust events from deserts. Both these contribute to increased atmospheric aerosol  
252 concentrations. These enhancements, including the use of hourly GEMS surface reflectance and incorporation of monthly  
253 BAOD, can result in improved aerosol retrieval.

254

#### 255 2.1.4 Cloud masking procedure

256 The GEMS aerosol algorithm retrieved AOPs only in cloud-free pixels. Clouds exhibit spatial inhomogeneity and higher  
257 brightness than aerosols. This study aimed to enhance the cloud-masking process in the GEMS aerosol algorithm by addressing  
258 the limitations of previous simple cloud-masking techniques. The previous method relied on a (1) fixed threshold for  
259 reflectance at 412 nm and (2) standard deviation test of reflectance within a  $3 \times 3$  pixel area. To improve the performance of  
260 cloud masking, an additional cloud removal technique has been introduced in this study. These tests include the following: (3)  
261 470/477 nm normalized radiance ratio test. It involves a threshold test for the ratio of the normalized radiance values at 470  
262 nm and 477 nm. This contrasts the presence of clouds using absorption bands of  $O_2-O_2$ . (4) The difference between hourly  
263 surface reflectance database and the calculated scene reflectivity at 412 nm: Significant differences indicate the presence of  
264 clouds (Torres et al., 2013). (5) Standard deviation test of normalized radiance at 477 nm within a  $3 \times 3$  pixel area: The  
265 threshold for this test can vary based on the latitude considering the regional differences in cloud characteristics. (5-1) Standard  
266 deviation in  $3 \times 3$  pixel  $> f(latitude)$  (5-2) after 3-1, standard deviation in  $3 \times 3$  pixels  $> f(latitude, number\ of\ cloud\ pixels$   
267  $detected\ method\ (1),\ (3),\ (4)\ in\ 3 \times 3\ pixels)$ . A final cloud mask was applied after the aerosol retrieval. This included (6)  
268 filtering out high AOD values using a threshold that is a function of the number of cloud pixels detected by methods (1), (3),  
269 (4), and (5) in  $11 \times 11$  pixel over the ocean (Lyapustin et al., 2021). This helps remove residual clouds. By implementing these  
270 new methods, the algorithm aims to improve the effectiveness of cloud detection and removal in GEMS pixels.

271

#### 272 3 GEMS post-process correction for the near-real-time retrieval

273 The GEMS AOD exhibited a diurnal bias pattern that fluctuated throughout the day. It formed a U-shape, with a minimum at  
274 03:00 UTC (as will be demonstrated in Section 5.1). To improve the accuracy of near real-time GEMS AOD retrieval, a model-  
275 enforced post-process correction step was implemented using a random forest (RF) model proposed by Lipponen et al. (2021).



276 This concept was trained to learn the relationship between the hourly GEMS data and AOD errors (GEMS-AERONET AOD)  
277 and to predict the AOD errors at the target time. To enable near real-time retrieval, the proposed method consists of two main  
278 parts: modelling and prediction. In the modelling part, the input data for the RF model includes GEMS data (normalized  
279 radiances at six wavelengths, scattering angle, viewing zenith angle (VZA), relative azimuth angle (RAA), SZA<sub>UV</sub> and VisAI,  
280 aerosol type, AOD, and clear fraction (ClearFrac) (which is the ratio of clear-sky pixels to the total pixels within the 0.25°  
281 radius from the pixel center)). The data also include auxiliary information such as time, land–sea mask, and elevation. The  
282 target data for training were the AOD errors. Each of these was calculated as the difference between the GEMS AOD and  
283 AERONET AOD at the corresponding single GEMS pixel where the AERONET site was located. The predictors and target  
284 variables were collected for a time window ranging from N days to one day before the target time. After conducting several  
285 tests, N was determined to be 30 days. In the prediction part, the input variables including the GEMS data and auxiliary  
286 information in the target time were used for the pretrained RF model. Using these inputs, the model predicted the error in the  
287 GEMS AOD in near real-time. This predicted error value was then applied to the first retrieved GEMS AOD from the retrieval  
288 algorithms. This resulted in the production of the post-processed GEMS AOD.

289 In addition, the diurnal bias pattern in the GEMS SSA also exhibited fluctuations throughout the day, forming a bell shape with  
290 a minimum at 03:45 UTC. This is shown in Section 5.2. The post-processing method adopted was similar to that used for AOD.  
291 This method was trained to determine the relationship between hourly GEMS data and SSA errors (the difference between  
292 GEMS at 443 nm and AERONET SSA at 440 nm) and predict SSA errors for the target time. The key difference between the  
293 RF model predicting the AOD error and that predicting the SSA error is as follows: the second model includes the GEMS SSA  
294 as an input variable, and then, 19 input parameters are used to construct the RF model.

295 Unlike AOD and SSA, the postprocessing of ALH using an RF model is inherently limited. CALIOP is predominantly used as  
296 reference data for ALH. Because CALIOP is an LEO satellite, pixels co-located with GEMS ALH data are available only from  
297 03:45 to 07:45 UTC. This renders it inaccessible as a reference hourly dataset covering 22:45–02:45 UTC. Unlike AERONET,  
298 the use of data from ground-based lidar is severely constrained by the limited number of observation stations and restricted  
299 geographical areas in which lidars are deployed.

300

#### 301 4Aerosol events

##### 302 4.1 Dust aerosol event (2022.04.08)

303 Figure 2 present an example of hourly maps of the GEMS aerosol product including AOD, SSA, ALH, UVAI, and VisAI for  
304 April 8, 2022. These results are the GEMS AOD and SSA before post-processing. The selected case is for the dust aerosol  
305 event over northwestern China. The GEMS false RGB is shown using R (477 nm), G (412 nm), and B (354 nm) bands similar  
306 to those of the OMI false RGB method (Levelt et al., 2006).

307 As shown in Figure 2, different retrieval regions with respect to time are shown as the GEMS scan profile varies with the SZA.  
308 Overall, the GEMS AOD shows a significantly good agreement with the AERONET AOD measurements. It captures higher  
309 values in the Beijing–Hebei–Tianjin (BTH) region and lower values over South Korea and Japan. High GEMS AOD values  
310 were evident along the dust plume, attaining two at 06:45 UTC. In the case of SSA, the retrieval results demonstrated a  
311 relatively lower accuracy (notably in the BTH region) compared with AOD. In general, from 22:45 to 05:45 UTC, the SSA  
312 values displayed good concordance with both AERONET and GEMS SSA. However, from 06:45 to 07:45 UTC, the SSA  
313 numbers did not match over Beijing. Compared with the Beijing region, the results are more consistent in the dust plume. The  
314 SSA values remained relatively stable at approximately 0.92–0.96 over time. However, the GEMS SSA tended to have a  
315 positive bias compared with the AERONET values. This is shown in Section 5.2. The GEMS ALHs were ~3–4 km for the dust





316 plume over the Taklamakan Desert and ~1.0 km over the Beijing region. The GEMS ALH exhibited continuous spatial and  
317 temporal patterns. The UVAI provides information regarding the radiative absorption of aerosols. It attained a maximum of  
318 four for dust plumes, thereby indicating significant aerosol absorption. However, over Beijing, the SSA was ~1. This indicated  
319 a marginal absorption owing to the different aerosol emission source. VisAI provides information on the aerosol size. In regions  
320 with a dust plume, the VisAI value was higher than that in the background areas. This indicated the presence of coarse aerosol  
321 particles.

322

#### 323 4.2 Biomass burning event (2022.03.19)

324 Figure 3 illustrates maps of the GEMS aerosol product at 06:45 UTC on March 19, 2022. It represents a biomass-burning event  
325 over mainland Southeast Asia. These results were obtained for the GEMS AOD and SSA before post-processing. During the  
326 dry season in this region, highly absorbing fine pollution particles are prevalent (Yin et al., 2019). The GEMS AOD > 1.6. This  
327 indicated a significant aerosol loading and enhancement during the event. The GEMS SSA was ~0.88. This indicated aerosol  
328 absorption during this event. The ALH ranged from 2 to 3 km within the biomass-burning plume. The GEMS ALH was not  
329 retrieved along the east-to-west straight line at ~22.5 °N, which are bad pixels in the CCD. The GEMS UVAI showed hotspots  
330 and fine features associated with this event. Thus, it captured aerosol absorption in the ultraviolet spectrum. VisAI exhibited  
331 higher values than the background. This case study demonstrates that the GEMS provides valuable insights into aerosol  
332 properties during specific events such as biomass burning, and can capture temporal and spatial variations in AOD, SSA, ALH,  
333 UVAI, and VisAI.

334 Figure 3g shows a comparison of the CALIOP extinction coefficients at 532 nm, the CALIOP ALH, and the GEMS ALH over  
335 the CALIOP path (the green line on the GEMS false RGB image in Figure 3a). Figure 3g illustrates a clear relationship between  
336 the GEMS AOD and accuracy of GEMS ALH. The accurate retrieval of ALH requires the presence of a sufficient amount of  
337 aerosols in the atmosphere. GEMS ALH closely follows the latitudinal variation in CALIOP ALH. As the latitude increased  
338 from 18° to 21°, the GEMS ALH followed the CALIOP ALH and showed an increase in altitude. In the latitude range of 24°–  
339 28°, the GEMS AOD decreased, and the GEMS ALH exhibited scattered variations owing to weaker signals. In the scatter plot  
340 comparing CALIOP ALH and GEMS ALH (Figure 3h), 39.88% of the pixels are within the expected error range of 0.5 km,  
341 and 68.10% of the pixels are within the expected error range of 1 km. As the GEMS AOD values decreased, the GEMS ALH  
342 pixels were more likely to be outside the expected error range.

343

#### 344 4.3 Absorbing aerosol event (2021.12.04, 2021.12.23)

345 Figure 4 shows an example of the GEMS AOD before and after post-processing for an absorbing aerosol case over Indo-  
346 Gangatic Plane (IGP) at 04:45 UTC on December 4, 2021. During the wintertime in this region, atmospheric haze is prevalent  
347 (Ram et al., 2012). Recent studies have shown that primary aerosols and precursors for secondary aerosols emitted from fossil  
348 fuel combustion and biomass burning are released into the atmosphere (Singh et al., 2021). Figure 4a shows the GEMS false  
349 RGB image with AERONET stations represented by circles. The color indicates the AERONET AOD. Two distinct aerosol  
350 plumes are observed. The northwest shows an AOD of ~0.8, whereas the southeast has a value of ~1.3. Figure 4b shows the  
351 GEMS AOD data. The spatial distribution of the GEMS AOD is similar to that of the AERONET AOD in Figure 4a. However,  
352 the values are marginally lower than those of the AERONET AOD. Meanwhile, the AOD increased after post-processing,  
353 particularly in the moderate AOD range (~0.7). Moreover, the GEMS AOD was closer to the AERONET AOD (Figure 4c).  
354 Specifically, at the Gandhi\_College site (25.871 °N, 84.128 °E) and Lahore (31.480 °N, 74.264 °E), postprocessing resulted  
355 in more reasonable values.



356 Figure 5 shows the maps of the GEMS SSA and the GEMS SSA after post-processing for an absorbing aerosol case over India,  
357 Bangladesh, and mainland Southeast Asia at 03:45 UTC on December 23, 2021. Figure 5a shows the GEMS false RGB image  
358 with AERONET stations represented by circles. The color indicates the AERONET SSA at 440 nm. The AERONET SSA  
359 values are ~0.9 in India and Bangladesh, and ~0.93 in Thailand. Before postprocessing, the GEMS SSAs exhibit values of  
360 ~0.96 in the Indian region and ~1.0 in the other areas. However, following postprocessing, the GEMS SSA values converged  
361 to be more similar to the AERONET SSA values. Nonetheless, a marginal tendency for overestimation remained.

362

### 363 5 Validation in GEMS AERAOD product

364 This section evaluates the GEMS AOD and SSA at 443 nm according to the aerosol type and measurement time using the  
365 AERONET data in the entire GEMS domain. We used AERONET version 3 level 1.5 data to validate both AOD and SSA to  
366 ensure a larger dataset for validation purposes. Figure 6 illustrates a map of the AERONET sites used for GEMS AOD and  
367 SSA validation, in conjunction with site-specific data counts. The AERONET AOD data generally showed higher counts for  
368 South Korea, China, and Taiwan. Meanwhile, sites in South and Southeast Asia typically had fewer data points. Similarly, the  
369 number of AERONET SSA data points showed a distribution similar to that of AOD. However, AERONET sites #38, #39, and  
370 #47 in India had over 400 validation points. In addition, we retrieved the GEMS ALH and compared it with the CALIPSO  
371 level 2 extinction coefficient profiles at 532 nm as well as with the CALIOP ALH defined by Equation (2).

372

#### 373 5.1 Aerosol optical depth

374 In this section, the GEMS AOD at 443 nm is validated against AERONET data across the entire GEMS domain from November  
375 1, 2021 to October 31, 2022. The GEMS AOD data were spatially collocated within a  $0.25^\circ$  radius of the AERONET stations  
376 and temporally within a 30 min window of the GEMS measurement time. When a specific aerosol type in the GEMS was  
377 present in more than 90% of the pixels within the validation radius, an aerosol type validation was conducted.

378 Figure 7 presents the results for all the pixels and each aerosol type (HAF, dust, and NA). The statistics include R, RMSE,  
379 mean bias error (MBE), slope, y-offset, Q value indicating the percentage of data points within the maximum (0.1 or 30%  
380 AOD) error range, and the Global Climate Observing System (GCOS) requirement (defined as the maximum (0.03 or 10%  
381 AOD)). The total GEMS AOD demonstrated a good correlation with the AERONET AOD, with an R of 0.792, RMSE of 0.227,  
382 and MBE of 0.038 (Figure 7a). The Q value was calculated to be 54.84%, with 18.39% of the AOD satisfying the GCOS  
383 requirements. However, the slope and y-intercept were 0.589 and 0.193, respectively. This indicated an overestimation for a  
384 low AERONET AOD and an underestimation for a high AERONET AOD. In the case of a low AERONET AOD, there is  
385 evidence of cloud contamination effects. These result in an overestimation of the retrieved GEMS AOD.

386 The validation shows the differences by aerosol type. The HAF type showed the highest R and Q values compared with the  
387 other aerosol types (Figure 7b). Pixels that deviated beyond the error range owing to the GEMS AOD underestimation were  
388 notably observed in two main categories: sites in the Indian region (which still showed bias notwithstanding the consideration  
389 of BAOD) and sites located in Beijing with an AERONET AOD of approximately 2.0 and a GEMS AOD of approximately  
390 1.0. Among the three aerosol types, the dust type had the fewest samples, accounting for 1 / 10 of the NA (Figure 7c). The R-  
391 value was 0.786, and the slope was the highest among the three types. Pixels that deviated beyond the error range owing to  
392 GEMS AOD underestimation were primarily observed in the Indian region. In contrast, pixels exceeding the error range owing  
393 to GEMS AOD overestimation were located in Northeast Asia. Currently, GEMS uses the same aerosol model (number-size  
394 distribution parameters and real refractive index) over the entire domain for each aerosol type. However, given the varying  
395 bias patterns observed in the dust type, it is necessary to consider regional variations in the GEMS aerosol model (and thus,  
396 the LUT) in future studies. The NA type was selected most frequently among the three aerosol types (Figure 7d). Figure 7d



397 shows that a significant number of pixels are influenced by cloud contamination, which is particularly evident in regions with  
398 low NA AOD values. It appears that the GEMS aerosol cloud masking process requires further improvement, particularly over  
399 the ocean. The current cloud-masking process may not effectively distinguish small clouds (i.e., broken clouds) near equatorial  
400 regions. This results in an overestimation of the AOD owing to cloud contamination. This phenomenon has been observed  
401 frequently at AERONET stations located near the equator. The underestimation of high AOD values in the GEMS aerosol  
402 algorithm can be attributed to the effect of the current aerosol model assumption used in the algorithm. This emphasizes the  
403 importance of understanding the AOPs to better characterize these in the atmosphere, particularly in the UV region.

404

405 **Figure S2** and Table 2 present the hourly AOD validation results and statistical metrics including N, R, slope, y-intercept,  
406 RMSE, MBE, Q value, and GCOS. It is important to note that the GEMS varies its E-W scan profile depending on the SZA.  
407 Therefore, the sites used for validation may not have remained consistent over time. For example, the AERONET stations  
408 around 22:45 UTC and 23:45 UTC were mostly used for validation in the eastern region of GEMS, whereas those around  
409 06:45 UTC and 07:45 UTC were expected to be in the western region of GEMS. A systematic error analysis is planned in a  
410 future study. Nevertheless, the hourly validation results of the GEMS AOD provide significant insights. The hourly slopes of  
411 the GEMS AOD exhibited a diurnal variation, starting at 0.730 at 22:45 UTC; decreasing to 0.534 and 0.555 by 1:45 UTC  
412 and 2:45 UTC, respectively; and subsequently increasing to 0.647 and 0.617 at 06:45 and 7:45 UTC, respectively. However,  
413 the R-values remained relatively stable over time. Most time intervals exhibited R values of approximately 0.77 or higher  
414 except for 22:45. Figure S2 and Table 2 show that the diurnal variation in GEMS AOD did not precisely reflect the actual  
415 diurnal AOD variation. Thus, it is necessary to correct and produce a consistent dataset over time to investigate the diurnal  
416 variations in aerosol properties. A machine learning model using RF was used to train the hourly dependent error  
417 characteristics, remove artifacts in the retrieval processes, and maintain the physical signals.

418 Figure 8a shows the comparison results for GEMS AOD after model-enforced post-processing correction with AERONET  
419 data. For near-real-time post-processing correction, data from the past 30 days were used for training. Therefore, these results  
420 were evaluated over 11 months: from December 1, 2021, to October 31, 2022. Figure 8a shows that all the statistical metrics  
421 improved. In particular, the slope was closer to one at 0.809, and the y-intercept was closer to zero at 0.068. Additionally, R,  
422 RMSE, and MBE were 0.899, 0.159, and -0.005, respectively. The Q value and GCOS requirements also improved to 79.13%  
423 and 36.08%, respectively. The bias near low AOD values of approximately zero was reduced significantly. Furthermore, the  
424 high AOD values were closer to the 1:1 line. Figure 8b shows the bias of the GEMS AODs before and after post-process  
425 correction with respect to time for all the AOD pixels. After applying the model-enforced post-process correction to the GEMS  
426 AOD data, significant improvements in bias were observed over the diurnal cycle. The original GEMS AOD exhibited an  
427 hourly-dependent bias characteristic. It formed a U-shape with a minimum value near noon, 03:45 UTC. However, with the  
428 implementation of the model-enforced post-processing correction, the diurnal bias was mitigated effectively. This resulted in  
429 a bias value close to zero throughout the day and a decreased standard deviation. Figure 8c illustrates the diurnal variation in  
430 the bias of a low AOD (AERONET AOD < 0.4). The GEMS AOD (red circles) exhibited a positive bias of -0.1. It was mostly  
431 corrected to values close to zero after post-processing (blue circles). However, certain positive bias was observed at  
432 approximately 22:45 and 23:45 UTC, and at 06:45 and 07:45 UTC. Figure 8d shows the diurnal variation in the bias of high  
433 AOD (AERONET AOD > 0.4). The diurnal variation in GEMS AOD (red circles) shows a clear U-shaped pattern with a  
434 maximum negative bias of approximately -0.2 at 0.3 UTC. However, after post-processing, the bias was still negative but less  
435 than -0.1, which is significantly closer to zero. By incorporating the predicted error, we obtained an improved GEMS AOD  
436 that considers the uncertainties and biases inherent in the retrieval process. This approach helps reduce these biases, including  
437 a low AOD overestimation, high AOD underestimation, and artificial diurnal bias in near-real-time AOD retrievals. The  
438 reduction in artifactual diurnal bias is crucial for ensuring the reliability of hourly GEMS AOD data. This is because it



439 eliminates time-dependent discrepancies and provides a more representative hourly aerosol distribution. Users can now rely  
440 on corrected GEMS AOD data for various applications without being influenced by diurnal variations in the original  
441 measurements. Variable importance analysis for the post-processing correction of the GEMS AOD was conducted (Figure S3).  
442 GEMS AOD was the most important variable, emphasizing its direct influence on the correction process. VZA and elevation  
443 exhibited high importance. However, their significance can be attributed not only to their inherent properties but also to their  
444 role in conveying AERONET location-related information. Aerosol type appeared to have less significance in the RF models.  
445 This result contrasted with the notable importance of GEMS UVAI and VisAI. This discrepancy can originate from inaccurate  
446 aerosol type classification in the GEMS aerosol algorithm.

447

#### 448 5.2 Single-scattering albedo

449 This section presents a comparison of the GEMS SSA at 443 nm with the AERONET SSA at 440 nm in the entire GEMS  
450 domain. The validation period and collocation criteria for the AERONET sites were identical to those for the GEMS AOD.  
451 Similar to the AOD, when a particular aerosol type in the GEMS was detected for over 90% of the pixels within a 0.25° radius,  
452 we performed aerosol-type validation. Figure 9 and Table 3 display the validation results for all pixels and each aerosol type.  
453 The statistics including N and percentages are within the expected error ranges (0.03 and 0.05). The uncertainty of SSA is  
454  $\pm 0.03$  when AERONET AOD 440 nm is over 0.4 (Dubovik et al., 2002). The gray dashed lines indicate an uncertainty envelope  
455 of  $\pm 0.03$  in SSA, whereas the black dashed lines indicate an uncertainty envelope of  $\pm 0.05$  in SSA. These reference lines help  
456 assess the agreement between the GEMS SSA and AERONET data within a reasonable error range. When aerosols are not  
457 abundant in the atmosphere, capturing SSA signals from satellite observations is challenging. Therefore, for validation,  
458 separate analyses were conducted for the cases where the GEMS AOD  $> 0.4$  (indicated by the red open circles) and the GEMS  
459 AOD was  $> 1.0$  (indicated by the blue open circles). Notwithstanding the large uncertainties associated with the satellite  
460 measurements, the GEMS aerosol product showed a good overall agreement with the AERONET SSA. When GEMS AOD  
461 exceeds 0.4, the percentage of GEMS SSA within the expected error range of  $\pm 0.03$  is denoted by 42.76%, and that within the  
462 expected error range of  $\pm 0.05$  is denoted by 67.25%. When the aerosol signal is strong (when GEMS AOD exceeds 1.0), the  
463 percentage of GEMS SSA within the expected error of  $\pm 0.03$  (0.05) increases to 56.61% (83.70%). However, the percentage  
464 within the expected error range and scatter plots varied depending on the aerosol type. For the HAF type, the SSAs showed  
465 the largest spread. This indicated a lower accuracy. It was likely to be a result of an ineffective aerosol-type selection (red  
466 circles). However, when AOD exceeds 1.0 (blue circles), these tend to approach the 1:1 line. Moreover, the percentage falling  
467 within the expected error range of  $\pm 0.03$  increases significantly. For the dust type, the GEMS SSA exhibited a positive bias of  
468 approximately 0.04 compared with the AERONET SSA (red circles). Similarly, when the AOD exceeds 1.0, these biases  
469 decrease, approaching the 1:1 line (blue circles). However, the systematic bias observed in the GEMS SSA for the dust type  
470 indicates the need to refine the assumed dust AOPs in the LUT. The NA type in GEMS was observed to have a significantly  
471 low variability compared with AERONET SSA. The GEMS SSAs showed values close to one compared with the AERONET  
472 data. According to Lee et al. (2010), the NA type is identified when the SSA is above 0.95. However, many NA-type pixels  
473 were observed, with AERONET SSA values below 0.95 in the NA type. This indicates potential inaccuracies in the  
474 classification of the absorbing and NA GEMS aerosol types. Nevertheless, when the AOD is high (blue circles), these  
475 classification errors tend to decrease. This results in values closer to the AERONET SSA.

476 Figure S4 and Table 4 present the hourly SSA validation results and statistic metrics including the N and percentage within  
477 the expected error range of  $\pm 0.03$  ( $\pm 0.05$ ). The GEMS and AERONET SSA exhibited varying distributions over time. The  
478 difference between the GEMS and AERONET SSA was most significant at 03:45 and 04:45 UTC, with a positive bias. This  
479 difference decreased at 22:45 and 23:45 UTC or 05:45 and 06:45 UTC (Figure S4). Similar to the GEMS AOD, the GEMS  
480 SSA showed diurnal variations. These are also reflected in the EE% values shown in Table 4. At 22:45 and 23:45 UTC, the



481 percentage within the expected error range of  $\pm 0.03$  exceeded 60%. However, it reduced to less than 30% at 03:45 and 04:45  
482 UTC before increasing again. Further studies are required to understand the bias and accuracy variations in the SSA and  
483 improve the retrieval results. This can also be attributed to the shorter path length in the observation geometry when the  
484 influence of surface reflectance increases, similar to that in AODs.

485 Figure 10a presents the comparison results for the GEMS SSA after post-process correction and the AERONET data. The  
486 near-real-time post-process correction utilized data from the preceding 30 days for training. The validation period was from  
487 December 1, 2021, to October 31, 2022. Notably, all the statistical metrics demonstrated improvements. Specifically, the  
488 percentage of GEMS SSA falling within the expected error range of  $\pm 0.03$  was recorded at 68.33%, whereas the percentage  
489 within the range of  $\pm 0.05$  was indicated at 88.86%. Furthermore, the SSA values exhibited a closer alignment with the 1:1  
490 line. Figure 10b depicts the difference between the GEMS and AERONET SSA over the measurement time. Notably, the  
491 bias pattern observed in the GEMS SSA exhibits artifactual characteristics, thereby forming a bell-shaped curve. In  
492 particular, during the time interval from 01:45 to 05:45 UTC, the mean bias of GEMS SSA consistently surpassed the  
493 expected error range of  $\pm 0.03$ . However, the implementation of model-enforced post-process correction was demonstrated to  
494 be highly effective in mitigating this artificial diurnal bias. This correction methodology resulted in a significant  
495 improvement in the GEMS SSA values within the expected error range. Thereby, it enhanced the overall accuracy of the SSA  
496 retrieval. Variable importance analysis for the post-processing correction of the GEMS SSA was conducted (Figure S5). The  
497 GEMS SSA was the most important variable in the correction process. The GEMS AOD also emerged as a highly influential  
498 variable in the RF models for GEMS SSA post-process correction. Also, aerosol types appeared to have relatively lower  
499 significance within the RF models for SSA correction.

500

### 501 5.3 Aerosol layer height

502 From November 1, 2021 to October 31, 2022, the GEMS and CALIOP data were co-located for comparison. In this section,  
503 the level-2 aerosol extinction coefficients at 532 nm are used to calculate the CALIOP ALH. This is shown in Equation 2.  
504 GEMS ALH pixels within a  $0.05^\circ$  radius surrounding each CALIOP pixel were averaged and compared with the CALIOP  
505 ALHs within a time window of 1 h from the GEMS observation time. The validation was conducted when the GEMS AOD  
506 values were larger than 0.2. This was because the error in ALH retrieval increased when the presence of aerosols in the  
507 atmosphere was insufficient. Figure 11a shows a histogram of the differences between the GEMS and CALIOP ALH. The total  
508 co-located number of data is 77,318, and the mean difference is -0.225 km. The median of differences is -0.167 km. This  
509 indicates that the histogram distribution of the differences follows a Gaussian distribution although it is skewed marginally in  
510 a positive direction. Figure 11b shows a comparison between the GEMS and CALIOP ALH. These were distributed  
511 predominantly at altitudes less than 2 km. The percentage of data falling within the expected error of  $\pm 1$  km was 55.3%, and  
512 the percentage falling within the expected error of  $\pm 1.5$  km was 71.7%. The variability of the GEMS ALH was comparable to  
513 that of the CALIOP ALH.

514

### 515 6 Summary and future work

516 In this study, we present the first atmospheric aerosol monitoring results from GEMS over Asia. Given that the GEMS  
517 AERAOD algorithm was developed using OMI as input data before GEMS launch, modifications were made considering the  
518 GEO observation characteristics during the IOT period. A new hourly surface reflectance database was created using the  
519 minimum reflectance method with a fine spatial resolution that aligned with the GEMS pixel resolution. In addition, monthly  
520 BAOD maps were incorporated to estimate the hourly GEMS surface reflectance. A new cloud removal techniques



521 significantly improved effectiveness of cloud detection and enhanced the quality of aerosol retrievals. To avoid discrepancies  
522 between observed and simulated radiance that may arise due to the monochromatic assumption of LUT calculation, we applied  
523 a spectral binning approach to LUT calculation. Finally, post-process correction methods based on machine learning were used  
524 to remove the non-physical diurnal biases in AOD and SSA retrieval. This reduced the biases over time and provided more  
525 reliable hourly GEMS aerosol products in near real-time.

526 The GEMS aerosol product was investigated for three specific events: dust events over Northeast Asia, biomass burning in  
527 Southeast Asia, and the absorption of aerosols over India. These events highlight the capability of the GEMS to monitor and  
528 provide insights into aerosol properties during various atmospheric events while also emphasizing the importance of post-  
529 processing for data accuracy and agreement with ground measurements.

530 The GEMS aerosol products were validated against the AERONET and CALIOP data for the entire GEMS domain for one  
531 year (from November 2021 to October 2022). The performance of the GEMS aerosol algorithm was validated to verify its  
532 applicability for studying the distribution of AOPs across Asia. The validation results for each product are summarized below:

533 GEMS AOD shows a good correlation with the AERONET AOD ( $R = 0.792$ ). However, it exhibits certain bias patterns.  
534 Notably, an underestimation of AOD in high AERONET AOD and overestimation of AOD in low AERONET AOD occurred  
535 owing to cloud contamination. Different aerosol types exhibited varying validation results: the HAF type with the highest  $R$   
536 and  $Q$  values; the dust type with underestimation in India but overestimation in Northeast Asia; and NA type with cloud  
537 contamination issues, particularly for low AOD. This indicated the need for an improvement in the cloud masking process,  
538 particularly over the ocean. Certain deviations beyond the error range of the GEMS AOD were observed in India and Beijing.  
539 The underestimation of the high AOD values can be attributed to the aerosol model. Diurnal variation in retrieval performance  
540 was evident with varying slopes and other comparison statistics throughout the day. As the testbed for the GEMS algorithm  
541 was on the LEO platform, the time-dependent retrieval bias had not been observed previously. Therefore, we adopted a model-  
542 enforced post-process correction and find that this enhances GEMS AOD performance, reducing overall biases. This corrected  
543 data ensures reliability for various applications.

544 The GEMS SSA at 443 nm was validated against the AERONET SSA at 440 nm over the entire GEMS region. The GEMS  
545 SSA's agreement with the AERONET data was evaluated within a reasonable error range of  $\pm 0.03$  ( $\pm 0.05$ ). For GEMS AOD  
546 exceeding 0.4, 42.76 (67.25)% of GEMS SSA is within  $\pm 0.03$  (0.05) error. This increases to 56.61 (85.70)% for strong aerosol  
547 signals (GEMS AOD above 1.0). However, the accuracy varies among the aerosol types. The HAF type has a higher variability  
548 and lower accuracy. The dust type has a marginal positive bias, particularly when the AOD is high. Similar to AOD, post-  
549 process correction for the GEMS SSA data yielded significant enhancements in statistical metrics.

550 The GEMS and CALIOP data were then compared. The GEMS ALH was compared with the CALIOP ALH when the GEMS  
551 AOD exceeded 0.2. The results showed a mean difference of -0.225 km, with 55.29% of data being within  $\pm 1$  km and 71.70%  
552 being within  $\pm 1.5$  km. The GEMS ALH exhibited variability similar to that of CALIOP ALH.

553 Several methods can be used to further improve the results of the GEMS aerosol algorithm. First, additional satellite data could  
554 be integrated for cloud detection. Incorporating data from other satellite sensors with IR channels such as the AMI can provide  
555 complementary information for cloud masking. Second, it is necessary to consider the AOPs used in the LUT to improve the  
556 GEMS aerosol algorithm. It is particularly important to incorporate more ground-based observations in the UV region, such  
557 as those from the Pandora Instrument and SKYNET. Collecting ground-based observations in the UV region and incorporating  
558 these into LUT can enhance the performance of this algorithm. Finally, regional LUTs with data from diverse regions that  
559 consider the variability in AOPs based on regional characteristics are crucial. Overall, the improvements to the GEMS aerosol  
560 algorithm contribute to advancing our understanding of aerosol properties and their effects on the environment. Thereby, it



561 provides valuable information for diverse applications including air quality monitoring, air quality data assimilation, and health  
562 impact assessments in Asia.

563

564 *Code availability.* The GEMS L2 AERAOD algorithm is not available publicly.

565

566 *Data availability.* GEMS L2 AERAOD was downloaded from the Environmental Satellite Center website  
567 (<https://nesc.nier.go.kr/en/html/datasvc/index.do>).

568

569 *Author Contribution.* YC, JK, SG, and MK designed the experiments. WL and DL provided support for the data collection.  
570 SL, MK, HC, OT, and SP contributed to the algorithm development. YC wrote the manuscript with contributions from all the  
571 co-authors. JK reviewed and edited the manuscript. JK provided support and supervision. All the authors analyzed the  
572 measurement data and prepared the manuscript.

573

574 *Competing Interests.* At least one of the (co-)authors is a member of the editorial board of Atmospheric Measurement  
575 Techniques.

576

577 *Acknowledgements.* We thank all the principal investigators and their staff for establishing and maintaining the AERONET  
578 sites used in this investigation. The CALIOP V3.41 data were obtained from the NASA Langley Research Center Atmospheric  
579 Science Data Center at <https://asdc.larc.nasa.gov/project/CALIPSO>. The authors acknowledge the National Institute of  
580 Environmental Research, Korea Aerospace Research Institute, for providing the satellite data, and Professor Myoung-Hwan  
581 Ahn and his research group at Ewha Womans University for providing information regarding the GEMS specifications and  
582 Level 1 data.

583

584 *Financial Support.* This work was supported by a grant from the National Institute of Environment Research (NIER), funded  
585 by the Ministry of Environment (MOE) of the Republic of Korea (NIER-2023-04-02-050).

586

587



## 588 References

- 589 Ahn, C., Torres, O., and Jethva, H.: Assessment of OMI near-UV aerosol optical depth over land, *J. Geophys. Res. Atmos.*,  
590 119, 2457–2473, <https://doi.org/10.1002/2013jd020188>, 2014.
- 591 Ceamanos, X., Six, B., Moparth, S., Carrer, D., Georgeot, A., Gasteiger, J., Riedi, J., Attié, J.-L., Lyapustin, A., and Katsev,  
592 I.: Instantaneous aerosol and surface retrieval using satellites in geostationary orbit (iAERUS-GEO) – estimation of 15 min  
593 aerosol optical depth from MSG/SEVIRI and evaluation with reference data, *Atmos. Meas. Tech.*, 16, 2575–2599,  
594 <https://doi.org/10.5194/amt-16-2575-2023>, 2023.
- 595 Choi, M., Kim, J., Lee, J., Kim, M., Park, Y.-J., Holben, B., Eck, T. F., Li, Z., and Song, C. H.: GOCI Yonsei aerosol retrieval  
596 version 2 products: an improved algorithm and error analysis with uncertainty estimation from 5-year validation over East  
597 Asia, *Atmos. Meas. Tech.*, 11, 385–408, <https://doi.org/10.5194/amt-11-385-2018>, 2018.
- 598 Curier, R. L., Veeffkind, J. P., Braak, R., Veihelmann, B., Torres, O., and de Leeuw, G.: Retrieval of aerosol optical properties  
599 from OMI radiances using a multiwavelength algorithm: Application to western Europe. *J. Geophys. Res. Atmos.*, 113(D17),  
600 2008.
- 601 Dobber, M., Kleipool, Q., Dirksen, R., Levelt, P., Jaross, G., Taylor, S., Kelly, T., Flynn, L., Leppelmeier, G., and Rozemeijer,  
602 N.: Validation of Ozone Monitoring Instrument level 1b data products, *J. Geophys. Res.*, 113,  
603 <https://doi.org/10.1029/2007jd008665>, 2008.
- 604 Dubovik, O. and King, M. D.: A flexible inversion algorithm for retrieval of aerosol optical properties from Sun and sky  
605 radiance measurements, *J. Geophys. Res.*, 105, 20673–20696, <https://doi.org/10.1029/2000JD900282>, 2000.
- 606 Giles, D. M., Sinyuk, A., Sorokin, M. G., Schafer, J. S., Smirnov, A., Slutsker, I., Eck, T. F., Holben, B. N., Lewis, J. R.,  
607 Campbell, J. R., Welton, E. J., Korkin, S. V., and Lyapustin, A. I.: Advancements in the Aerosol Robotic Network (AERONET)  
608 Version 3 database – automated near-real-time quality control algorithm with improved cloud screening for Sun photometer  
609 aerosol optical depth (AOD) measurements, *Atmos. Meas. Tech.*, 12, 169–209, <https://doi.org/10.5194/amt-12-169-2019>, 2019.
- 610 Go, S., Kim, J., Mok, J., Irie, H., Yoon, J., Torres, O., Krotkov, N. A., Labow, G., Kim, M., Koo, J.-H., Choi, M., and Lim, H.:  
611 Ground-based retrievals of aerosol column absorption in the UV spectral region and their implications for GEMS  
612 measurements, *Remote Sens. Environ.*, 245, <https://doi.org/10.1016/j.rse.2020.111759>, 2020.
- 613 Go, S., Kim, J., Park, S. S., Kim, M., Lim, H., Kim, J.-Y., Lee, D.-W., and Im, J.: Synergistic Use of Hyperspectral UV-Visible  
614 OMI and Broadband Meteorological Imager MODIS Data for a Merged Aerosol Product, *Remote Sens.*, 12,  
615 <https://doi.org/10.3390/rs12233987>, 2020.
- 616 Holben, B. N., Eck, T. F., Slutsker, I., Tanre, D., Buis, J. P., Setzer, A., Vermote, E., Reagan, J. A., Kaufman, Y., Nakajima, T.,  
617 Lavenue, F., Jankowiak, I., and Smirnov, A.: AERONET – A federated instrument network and data archive for aerosol  
618 characterization, *Remote Sens. Environ.*, 66, 1–16, [https://doi.org/10.1016/S0034-4257\(98\)00031-5](https://doi.org/10.1016/S0034-4257(98)00031-5), 1998.
- 619 Hsu, N. C., Lee, J., Sayer, A. M., Kim, W., Bettenhausen, C., and Tsay, S. C.: VIIRS Deep Blue Aerosol Products Over Land:  
620 Extending the EOS Long-Term Aerosol Data Records, *J. Geophys. Res. Atmos.*, 124, 4026–4053,  
621 <https://doi.org/10.1029/2018jd029688>, 2019.
- 622 Hsu, N. C., Si-Chee, T., King, M. D., and Herman, J. R.: Aerosol properties over bright-reflecting source regions, *IEEE Trans.*  
623 *Geosci. Remote Sens.*, 42, 557–569, <https://doi.org/10.1109/tgrs.2004.824067>, 2004.
- 624 Hsu, N. C., Tsay, S. C., King, M. D., and Herman, J. R.: Deep Blue Retrievals of Asian Aerosol Properties During ACE-Asia,





- 625 IEEE Trans. Geosci. Remote Sens., 44, 3180–3195, <https://doi.org/10.1109/tgrs.2006.879540>, 2006.
- 626 Jackson, J. M., Liu, H., Laszlo, I., Kondragunta, S., Remer, L. A., Huang, J., and Huang, H.-C.: Suomi-NPP VIIRS aerosol  
627 algorithms and data products, *J. Geophys. Res. Atmos.*, 118, 12,673–612,689, <https://doi.org/10.1002/2013jd020449>, 2013.
- 628 Jethva, H., Satheesh, S. K., and Srinivasan, J.: Assessment of second-generation MODIS aerosol retrieval (Collection 005) at  
629 Kanpur, India, *Geophys. Res. Lett.*, 34, <https://doi.org/10.1029/2007gl029647>, 2007.
- 630 Kalashnikova, O. V., Garay, M. J., Martonchik, J. V., and Diner, D. J.: MISR Dark Water aerosol retrievals: operational  
631 algorithm sensitivity to particle non-sphericity, *Atmos. Meas. Tech.*, 6, 2131–2154, <https://doi.org/10.5194/amt-6-2131-2013>,  
632 2013.
- 633 Kang, M., Ahn, M.-H., Liu, X., Jeong, U., and Kim, J.: Spectral Calibration Algorithm for the Geostationary Environment  
634 Monitoring Spectrometer (GEMS), *Remote Sens.*, 12, <https://doi.org/10.3390/rs12172846>, 2020.
- 635 Kayetha, V., Torres, O., and Jethva, H.: Retrieval of UV–visible aerosol absorption using AERONET and OMI–MODIS  
636 synergy: spatial and temporal variability across major aerosol environments, *Atmos. Meas. Tech.*, 15, 845–877,  
637 <https://doi.org/10.5194/amt-15-845-2022>.
- 638 Kim, J., Jeong, U., Ahn, M.-H., Kim, J. H., Park, R. J., Lee, H., Song, C. H., Choi, Y.-S., Lee, K.-H., Yoo, J.-M., Jeong, M.-J.,  
639 Park, S. K., Lee, K.-M., Song, C.-K., Kim, S.-W., Kim, Y. J., Kim, S.-W., Kim, M., Go, S., Liu, X., Chance, K., Chan Miller,  
640 C., Al-Saadi, J., Veihelmann, B., Bhartia, P. K., Torres, O., Abad, G. G., Haffner, D. P., Ko, D. H., Lee, S. H., Woo, J.-H.,  
641 Chong, H., Park, S. S., Nicks, D., Choi, W. J., Moon, K.-J., Cho, A., Yoon, J., Kim, S.-k., Hong, H., Lee, K., Lee, H., Lee, S.,  
642 Choi, M., Veeffkind, P., Levelt, P. F., Edwards, D. P., Kang, M., Eo, M., Bak, J., Baek, K., Kwon, H.-A., Yang, J., Park, J., Han,  
643 K. M., Kim, B.-R., Shin, H.-W., Choi, H., Lee, E., Chong, J., Cha, Y., Koo, J.-H., Irie, H., Hayashida, S., Kasai, Y., Kanaya,  
644 Y., Liu, C., Lin, J., Crawford, J. H., Carmichael, G. R., Newchurch, M. J., Lefer, B. L., Herman, J. R., Swap, R. J., Lau, A. K.  
645 H., Kurosu, T. P., Jaross, G., Ahlers, B., Dobber, M., McElroy, C. T., and Choi, Y.: New Era of Air Quality Monitoring from  
646 Space: Geostationary Environment Monitoring Spectrometer (GEMS), *Bull. Am. Meteorol. Soc.*, 101, E1–E22,  
647 <https://doi.org/10.1175/bams-d-18-0013.1>, 2020.
- 648 Kim, M., Kim, J., Jeong, U., Kim, W., Hong, H., Holben, B., Eck, T. F., Lim, J. H., Song, C. K., Lee, S., and Chung, C. Y.:  
649 Aerosol optical properties derived from the DRAGON-NE Asia campaign, and implications for a single-channel algorithm to  
650 retrieve aerosol optical depth in spring from Meteorological Imager (MI) on-board the Communication, Ocean, and  
651 Meteorological Satellite (COMS), *Atmos. Chem. Phys.*, 16, 1789–1808, <https://doi.org/10.5194/acp-16-1789-2016>, 2016.
- 652 Kim, M., Kim, J., Torres, O., Ahn, C., Kim, W., Jeong, U., Go, S., Liu, X., Moon, K., and Kim, D.-R.: Optimal Estimation-  
653 Based Algorithm to Retrieve Aerosol Optical Properties for GEMS Measurements over Asia, *Remote Sens.*, 10,  
654 <https://doi.org/10.3390/rs10020162>, 2018.
- 655 Kim, M., Kim, S. H., Kim, W. V., Lee, Y. G., Kim, J., and Kafatos, M. C.: Assessment of Aerosol optical depth under  
656 background and polluted conditions using AERONET and VIIRS datasets, *Atmos. Environ.*, 245,  
657 <https://doi.org/10.1016/j.atmosenv.2020.117994>, 2021.
- 658 Kleipool, Q. L., Dobber, M. R., de Haan, J. F., and Levelt, P. F.: Earth surface reflectance climatology from 3 years of OMI  
659 data, *J. Geophys. Res.*, 113, <https://doi.org/10.1029/2008jd010290>, 2008.
- 660 Kondragunta, S., Laszlo, I., Zhang, H., Ciren, P., and Huff, A.: Air Quality Applications of ABI Aerosol Products from the  
661 GOES-R Series, in: *The GOES-R Series: A New Generation of Geostationary Environmental Satellites*, Elsevier, Amsterdam,  
662 the Netherlands, Oxford, UK, Cambridge MA, USA, 203–217, 2020.



- 663 Lee, S., Choi, M., Kim, J., Park, Y. J., Choi, J. K., Lim, H., Lee, J., Kim, M., and Cho, Y.: Retrieval of aerosol optical properties  
664 from GOCI-II observations: Continuation of long-term geostationary aerosol monitoring over East Asia, *Sci. Total Environ.*,  
665 903, 166504, <https://doi.org/10.1016/j.scitotenv.2023.166504>, 2023.
- 666 Lee, Y., Ahn, M.-H., Kang, M., and Eo, M.: Spectral replacement using machine learning methods for continuous mapping of  
667 the Geostationary Environment Monitoring Spectrometer (GEMS), *Atmos. Meas. Tech.*, 16, 153–168,  
668 <https://doi.org/10.5194/amt-16-153-2023>, 2023.
- 669 Lennartson, E. M., Wang, J., Gu, J., Castro Garcia, L., Ge, C., Gao, M., Choi, M., Saide, P. E., Carmichael, G. R., Kim, J., and  
670 Janz, S. J.: Diurnal variation of aerosol optical depth and PM<sub>2.5</sub> in South Korea: a synthesis from AERONET, satellite (GOCI),  
671 KORUS-AQ observation, and the WRF-Chem model, *Atmos. Chem. Phys.*, 18, 15125–15144, [https://doi.org/10.5194/acp-18-](https://doi.org/10.5194/acp-18-15125-2018)  
672 15125-2018, 2018.
- 673 Levelt, P. F., van den Oord, G. H. J., Dobber, M. R., Malkki, A., Huib, V., Johan de, V., Stammes, P., Lundell, J. O. V., and  
674 Saari, H.: The ozone monitoring instrument, *IEEE Trans. Geosci. Remote Sens.*, 44, 1093–1101,  
675 <https://doi.org/10.1109/tgrs.2006.872333>, 2006.
- 676 Levelt, P. F., Joiner, J., Tamminen, J., Veeffkind, J. P., Bhartia, P. K., Stein Zweers, D. C., Duncan, B. N., Streets, D. G., Eskes,  
677 H., van der A, R., McLinden, C., Fioletov, V., Carn, S., de Laat, J., DeLand, M., Marchenko, S., McPeters, R., Ziemke, J., Fu,  
678 D., Liu, X., Pickering, K., Apituley, A., González Abad, G., Arola, A., Boersma, F., Chan Miller, C., Chance, K., de Graaf, M.,  
679 Hakkarainen, J., Hassinen, S., Ialongo, I., Kleipool, Q., Krotkov, N., Li, C., Lamsal, L., Newman, P., Nowlan, C., Suleiman,  
680 R., Tilstra, L. G., Torres, O., Wang, H., and Wargan, K.: The Ozone Monitoring Instrument: overview of 14 years in space,  
681 *Atmos. Chem. Phys.*, 18, 5699–5745, <https://doi.org/10.5194/acp-18-5699-2018>, 2018.
- 682 Levy, R. C., Mattoo, S., Munchak, L. A., Remer, L. A., Sayer, A. M., Patadia, F., and Hsu, N. C.: The Collection 6 MODIS  
683 aerosol products over land and ocean, *Atmos. Meas. Tech.*, 6, 2989–3034, <https://doi.org/10.5194/amt-6-2989-2013>, 2013.
- 684 Lipponen, A., Kolehmainen, V., Kolmonen, P., Kukkurainen, A., Mielonen, T., Sabater, N., Sogacheva, L., Virtanen, T. H., and  
685 Arola, A.: Model-enforced post-process correction of satellite aerosol retrievals, *Atmos. Meas. Tech.*, 14, 2981–2992,  
686 <https://doi.org/10.5194/amt-14-2981-2021>, 2021.
- 687 Lipponen, A., Reinval, J., Väisänen, A., Taskinen, H., Lähivaara, T., Sogacheva, L., Kolmonen, P., Lehtinen, K., Arola, A.,  
688 and Kolehmainen, V.: Deep-learning-based post-process correction of the aerosol parameters in the high-resolution Sentinel-  
689 3 Level-2 Synergy product, *Atmos. Meas. Tech.*, 15, 895–914, <https://doi.org/10.5194/amt-15-895-2022>, 2022.
- 690 Lyapustin, A., Wang, Y., Go, S., Choi, M., Korkin, S., Huang, D., Knyazikhin, Y., Blank, K., and Marshak, A.: Atmospheric  
691 Correction of DSCOVR EPIC: Version 2 MAIAC Algorithm, *Front. Remote Sens.*, 2,  
692 <https://doi.org/10.3389/frsen.2021.748362>, 2021.
- 693 Lyapustin, A., Wang, Y., Korkin, S., and Huang, D.: MODIS Collection 6 MAIAC algorithm, *Atmos. Meas. Tech.*, 11, 5741–  
694 5765, <https://doi.org/10.5194/amt-11-5741-2018>, 2018.
- 695 Nanda, S., de Graaf, M., Veeffkind, J. P., Sneep, M., ter Linden, M., Sun, J., and Levelt, P. F.: A first comparison of TROPOMI  
696 aerosol layer height (ALH) to CALIOP data, *Atmos. Meas. Tech.*, 13, 3043–3059, <https://doi.org/10.5194/amt-13-3043-2020>,  
697 2020.
- 698 Park, S. S., Kim, J., Cho, Y., Lee, H., Park, J., Lee, D.-W., Lee, W.-J., and Kim, D.-R.: Retrieval Algorithm for Aerosol Effective  
699 Height from the Geostationary Environment Monitoring Spectrometer (GEMS), *Atmos. Meas. Tech. Discuss.*, <https://doi.org/10.5194/amt-223-136>.



- 701 Powell, K. A., Hu, Y., Omar, A., Vaughan, M. A., Winker, D. M., Liu, Z., Hunt, W. H., and Young, S. A.: Overview of the  
702 CALIPSO Mission and CALIOP Data Processing Algorithms, *J. Atmos. Ocean. Tech.*, 26, 2310–2323,  
703 <https://doi.org/10.1175/2009jtecha1281.1>, 2009.
- 704 Ram, K., Sarin, M.M., Sudheer, A.K., and Rengarajan, R.: Carbonaceous and Secondary Inorganic Aerosols during Wintertime  
705 Fog and Haze over Urban Sites in the Indo-Gangetic Plain, *Aerosol Air Qual. Res.*, 41, 359–370,  
706 <https://doi.org/10.4209/aaqr.2011.07.0105>, 2012.
- 707 Sayer, A. M., Hsu, N. C., Lee, J., Carletta, N., Chen, S. H., and Smirnov, A.: Evaluation of NASA Deep Blue/SOAR aerosol  
708 retrieval algorithms applied to AVHRR measurements, *J. Geophys. Res. Atmos.*, 122, 9945–9967,  
709 <https://doi.org/10.1002/2017JD026934>, 2017.
- 710 Singh, G. K., Choudhary, V., Rajeev, P., Paul, D., and Gupta, T.: Understanding the origin of carbonaceous aerosols during  
711 periods of extensive biomass burning in northern India. *Environ. Pollut.*, 270, 116082,  
712 <https://doi.org/10.1016/j.envpol.2020.116082>, 2021.
- 713 Sinyuk, A., Holben, B. N., Eck, T. F., Giles, D. M., Slutsker, I., Korkin, S., Schafer, J. S., Smirnov, A., Sorokin, M., and  
714 Lyapustin, A.: The AERONET Version 3 aerosol retrieval algorithm, associated uncertainties and comparisons to Version 2,  
715 *Atmos. Meas. Tech.*, 13, 3375–3411, <https://doi.org/10.5194/amt-13-3375-2020>, 2020.
- 716 Spurr, R. J. D.: VLIDORT: A linearized pseudo-spherical vector discrete ordinate radiative transfer code for forward model  
717 and retrieval studies in multilayer multiple scattering media, *J. Quant. Spectrosc. Radiat. Transf.*, 102, 316–342,  
718 <https://doi.org/10.1016/j.jqsrt.2006.05.005>, 2006.
- 719 Taskinen, H., Väisänen, A., Hatakka, L., Virtanen, T. H., Lähivaara, T., Arola, A., Kolehmainen, V., and Lipponen, A.: High-  
720 Resolution Post-Process Corrected Satellite AOD, *Geophys. Res. Lett.*, 49, <https://doi.org/10.1029/2022gl099733>, 2022.
- 721 Torres, O., Bhartia, P. K., Herman, J. R., Syntuk, A., Ginoux, P., and Holben, B.: A long term record of aerosol optical depth  
722 from TOMS observations D and comparison to AERONET measurements, *J. Atm. Sci.*, 59, 398–413, 2002.
- 723 Torres, O., Ahn, C., and Chen, Z.: Improvements to the OMI near-UV aerosol algorithm using A-train CALIOP and AIRS  
724 observations, *Atmos. Meas. Tech.*, 6, 3257–3270, <https://doi.org/10.5194/amt-6-3257-2013>, 2013.
- 725 Torres, O., Bhartia, P. K., Sinyuk, A., Welton, E. J., and Holben, B.: Total Ozone Mapping Spectrometer measurements of  
726 aerosol absorption from space: Comparison to SAFARI 2000 ground-based observations, *J. Geophys. Res.*, 110, D10S18,  
727 <https://doi.org/10.1029/2004JD004611>, 2005.
- 728 Torres, O., Tanskanen, A., Veihelmann, B., Ahn, C., Braak, R., Bhartia, P. K., Veefkind, P., and Levelt, P.: Aerosols and surface  
729 UV products from Ozone Monitoring Instrument observations: An overview, *J. Geophys. Res.*, 112,  
730 <https://doi.org/10.1029/2007jd008809>, 2007.
- 731 Torres, O., Jethva, H., Ahn, C., Jaross, G., and Loyola, D. G.: TROPOMI aerosol products: evaluation and observations of  
732 synoptic-scale carbonaceous aerosol plumes during 2018–2020, *Atmos. Meas. Tech.*, 13, 6789–6806,  
733 <https://doi.org/10.5194/amt-13-6789-2020>, 2020.
- 734 Wei, J., Li, Z., Sun, L., Peng, Y., Zhang, Z., Li, Z., Su, T., Feng, L., Cai, Z., and Wu, H.: Evaluation and uncertainty estimate  
735 of next-generation geostationary meteorological Himawari-8/AHI aerosol products, *Sci. Total Environ.*, 692, 879–891,  
736 <https://doi.org/10.1016/j.scitotenv.2019.07.326>, 2019.
- 737 Xu, X., Wang, J., Wang, Y., Zeng, J., Torres, O., Reid, J. S., Miller, S. D., Martins, J. V., and Remer, L. A.: Detecting layer



- 738 height of smoke aerosols over vegetated land and water surfaces via oxygen absorption bands: hourly results from  
739 EPIC/DSCOVR in deep space, *Atmos. Meas. Tech.*, 12, 3269–3288, <https://doi.org/10.5194/amt-12-3269-2019>, 2019.
- 740 Xu, X., Wang, J., Wang, Y., Zeng, J., Torres, O., Yang, Y., Marshak, A., Reid, J., and Miller, S.: Passive remote sensing of  
741 altitude and optical depth of dust plumes using the oxygen A and B bands: first results from EPIC/DSCOVR at Lagrange-1  
742 point, *Geophys. Res. Lett.*, 44, 7544–7554, <https://doi.org/10.1002/2017gl073939>, 2017.
- 743 Yin, S., Wang, X., Zhang, X., Guo, M., Miura, M., and Xiao, Y.: Influence of biomass burning on local air pollution in mainland  
744 Southeast Asia from 2001 to 2016, *Environ. Pollut.*, 254, 112949, <https://doi.org/10.1016/j.envpol.2019.07.117>, 2019.
- 745 Yoshida, M., Kikuchi, M., Nagao, T. M., Murakami, H., Nomaki, T., and Higurashi, A.: Common Retrieval of Aerosol  
746 Properties for Imaging Satellite Sensors, *J. Meteorol. Soc. Jpn. Ser. II*, 96B, 193–209, <https://doi.org/10.2151/jmsj.2018-039>,  
747 2018.
- 748 Zhang, H., Kondragunta, S., Laszlo, I., and Zhou, M.: Improving GOES Advanced Baseline Imager (ABI) aerosol optical  
749 depth (AOD) retrievals using an empirical bias correction algorithm, *Atmos. Meas. Tech.*, 13, 5955–5975,  
750 <https://doi.org/10.5194/amt-13-5955-2020>, 2020.
- 751 Zhang, H., Kondragunta, S., Laszlo, I., Liu, H., Remer, L. A., Huang, J., Superczynski, S., and Ciren, P.: An enhanced VIIRS  
752 aerosol optical thickness (AOT) retrieval algorithm over land using a global surface reflectance ratio database, *J. Geophys.*  
753 *Res. Atmos.*, 121, <https://doi.org/10.1002/2016jd024859>, 2016.
- 754 Zhang, W., Gu, X., Xu, H., Yu, T., and Zheng, F.: Assessment of OMI near-UV aerosol optical depth over Central and East  
755 Asia, *J. Geophys. Res. Atmos.*, 121, 382–398, <https://doi.org/10.1002/2015jd024103>, 2016.
- 756 Zhang, Z., Wu, W., Fan, M., Tao, M., Wei, J., Jin J., Tan, Y. and Wang, Q.: Validation of Himawari-8 aerosol optical depth  
757 retrievals over China, *Atmos. Environ.*, 199, <https://doi.org/10.1016/j.atmosenv.2018.11.024>, 2019.
- 758

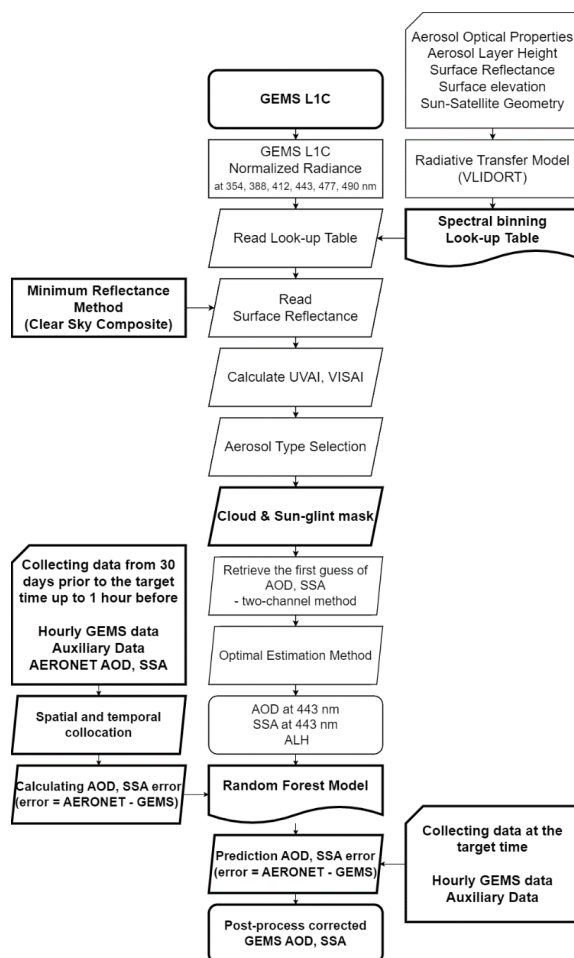

759

760 **Figure 1: The flowchart of the GEMS AERAOD retrieval algorithm and the modifications in the study (in bold boxes)**

761

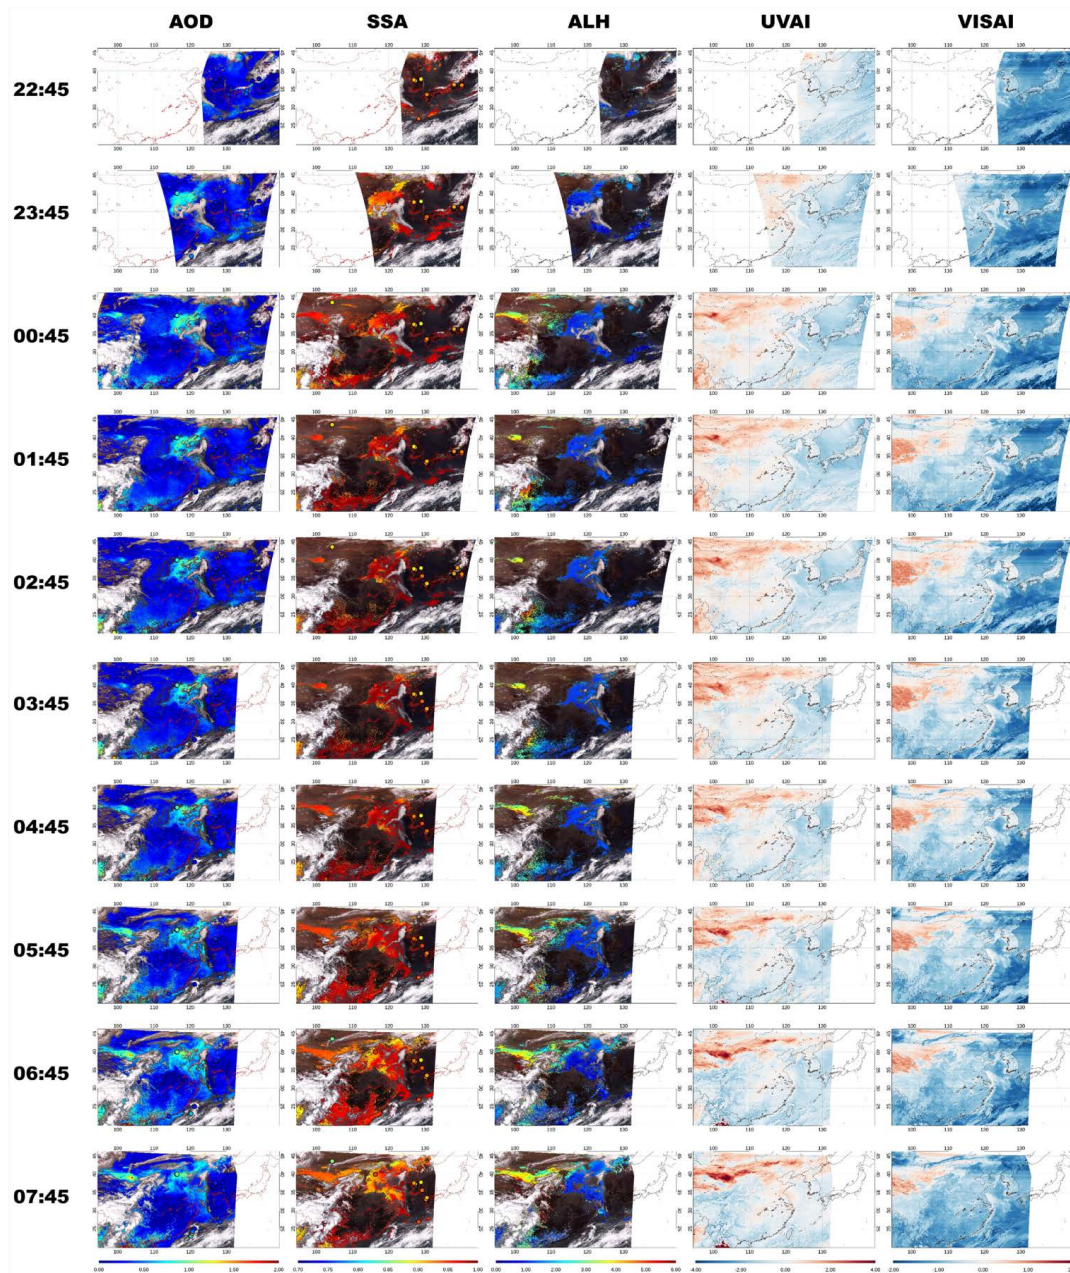

762

763 Figure 2: Hourly GEMS aerosol products for the dust case on April 8, 2022 over northwestern China. Time-series maps of AOD,  
764 SSA, ALH, UVAI, and VISAI from 22:45 to 07:45. The circle denotes an AERONET station, and the filled color indicates the  
765 AERONET AOD and SSA at 443 nm. The filled color indicates the AOD and SSA columns. GEMS SSA, and ALH are displayed only when GEMS AOD >  
766 0.2.

767

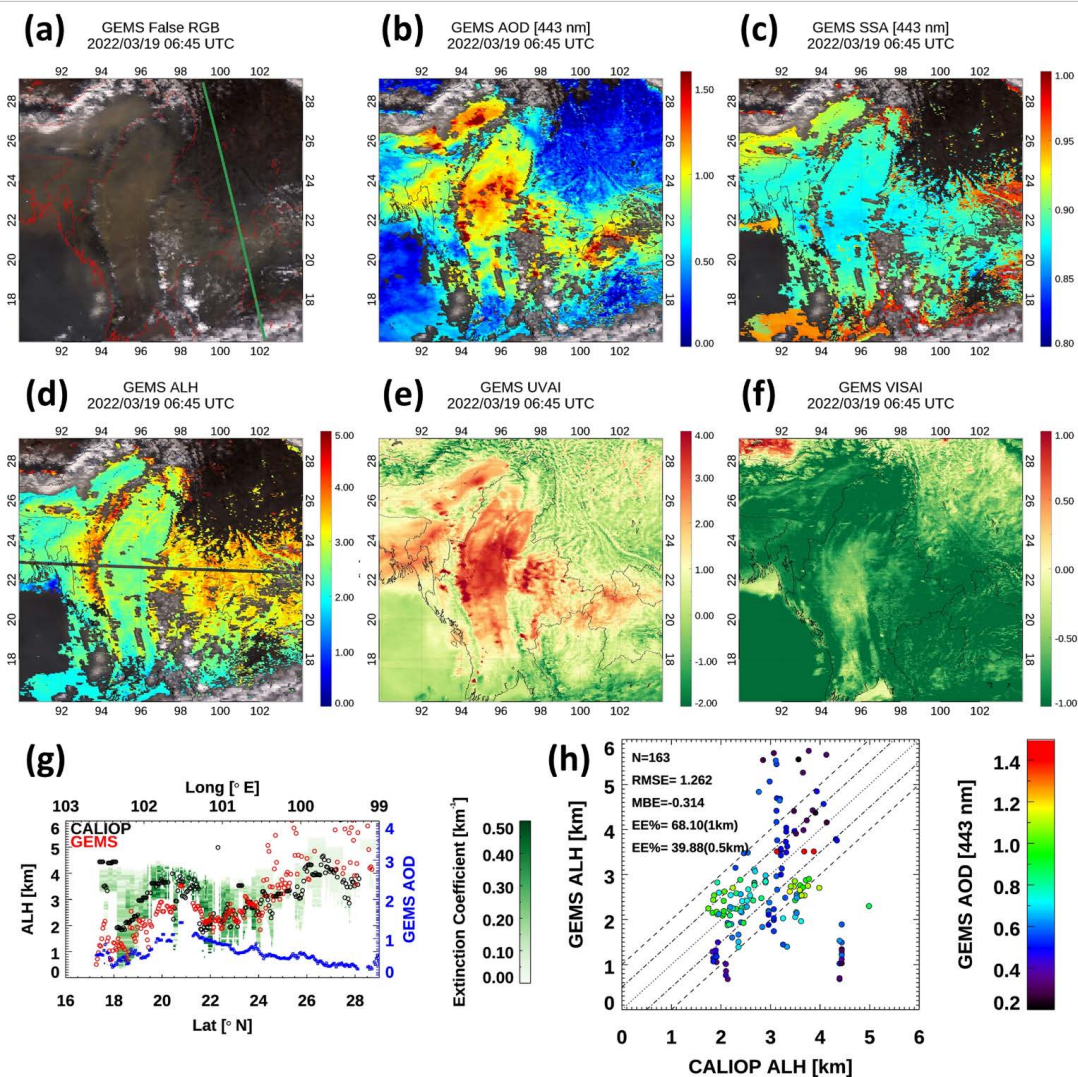

768

769 **Figure 3:** The example of GEMS aerosol products for biomass burning over mainland Southeast Asia. The maps of (a) GEMS  
 770 False RGB, (b) AOD, (c) SSA, (d) ALH, (e) UVAI, and (f) VisAI. The green line in GEMS False RGB indicates the overpass path of  
 771 CALIOP. The GEMS SSA and ALH are displayed only when the GEMS AOD is over 0.2. (g) GEMS ALH compared with CALIOP  
 772 extinction coefficient in the domain. The background color represents the CALIOP extinction coefficient. The black open circles  
 773 denote the CALIOP ALH, whereas the red open circles represent the GEMS ALH. The blue squares represent the GEMS AOD. (h)  
 774 Comparison of GEMS and CALIOP ALH when GEMS AOD > 0.2. The dashed and dash-dotted lines indicate an uncertainty  
 775 envelope of  $\pm 1$  km and  $\pm 0.5$  km in ALH, respectively. The dotted lines represent the 1:1 line. The color in the circles represents the  
 776 GEMS AOD.

777

778

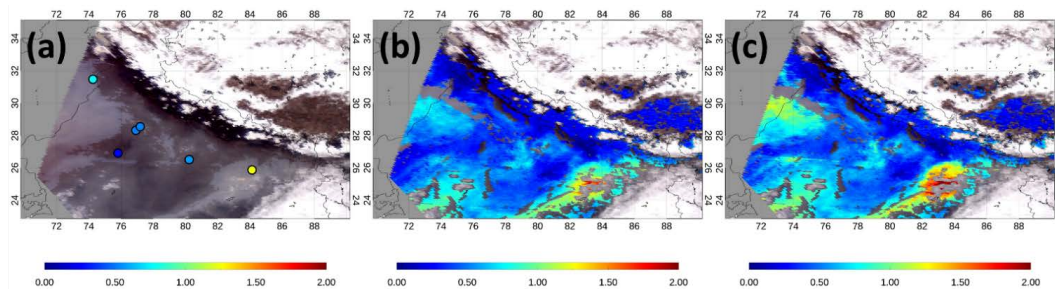

779

780 **Figure 4: The example of the GEMS AOD before and after post-processing for an absorbing aerosol case over Indo-Gangatic Plane**  
781 **at 04:45 UTC on December 4, 2021. (a) GEMS false RGB. The circle denotes an AERONET station, and the filled color indicates**  
782 **the AERONET AOD at 443 nm, (b) GEMS AOD and (c) GEMS AOD after post-process correction.**

783

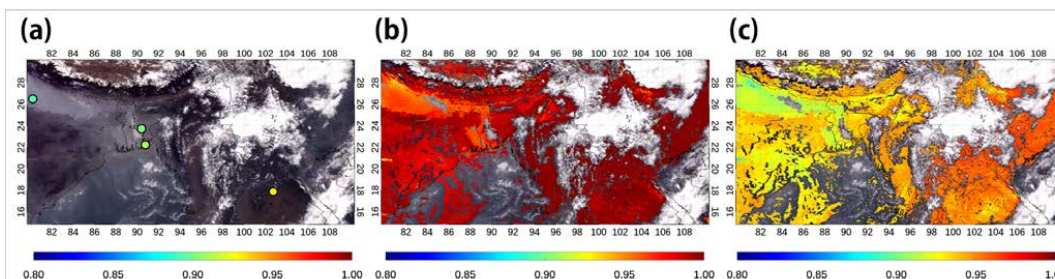

784

785 **Figure 5: The example of GEMS SSA and the GEMS SSA after post-processing for an absorbing aerosol case over India,**  
786 **Bangladesh, and mainland Southeast Asia at 03:45 UTC on December 23, 2021. (a) GEMS false RGB. The circle denotes an**  
787 **AERONET station, and the filled color indicates the AERONET SSA at 440 nm, (b) GEMS SSA, and (c) GEMS SSA after post-**  
788 **process correction.**

789





AERONET sites used for the GEMS AOD and SSA validation

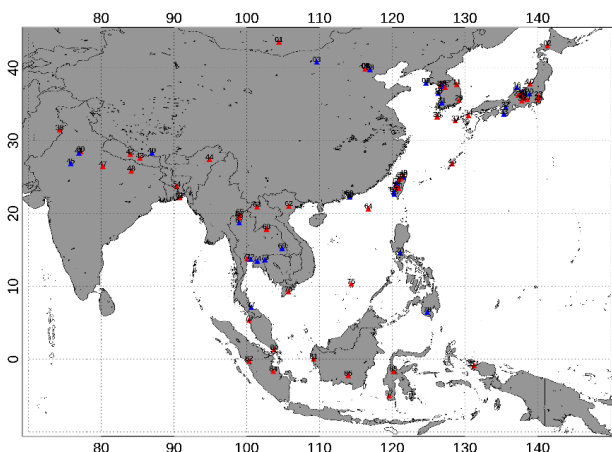

- |                                    |                                   |
|------------------------------------|-----------------------------------|
| 01: Dalanzadgad (915, 686)         | 45: Jaipur ( 54, 0)               |
| 02: Hokkaido_University( 345, 188) | 46: Okinawa_Hedo( 802, 285)       |
| 03: AOE_Beidou( 628, 0)            | 47: Kanpur( 610, 447)             |
| 04: Beijing_RAD(1229, 0)           | 48: Gandhi_College( 411, 275)     |
| 05: Beijing_PKU( 464, 222)         | 49: Cape_Fuguei_Station( 208, 87) |
| 06: Beijing1099( 0, 0)             | 50: Taipei_CWB( 433, 0)           |
| 07: Beijing-CAMS(1469,1154)        | 51: EPA-NCU( 757, 298)            |
| 08: XiangHe( 718, 0)               | 52: TASA_Taiwan( 771, 325)        |
| 09: Baengnyeong( 427, 0)           | 53: Xitun( 563, 0)                |
| 10: Nigata( 342, 197)              | 54: Dhaka_University( 636, 370)   |
| 11: Gangneung_VNU(1260, 759)       | 55: Doulu(1033, 403)              |
| 12: Incheon( 422, 303)             | 56: Lunin( 516, 159)              |
| 13: Yonsei_University(1053, 781)   | 57: Chen-Kung_Univ( 807, 0)       |
| 14: Seoul_SNU(1046, 0)             | 58: Kachisung( 818, 0)            |
| 15: Hankuk_UFS( 997, 501)          | 59: Hong_Kong_Sheung( 30, 0)      |
| 16: Netu( 296, 0)                  | 60: Hong_Kong_PolyU( 597, 0)      |
| 17: DRAGON_Hakuba( 5, 0)           | 61: Bholai( 488, 304)             |
| 18: Anmyon( 958, 0)                | 62: NGHIA_DO( 182, 66)            |
| 19: DRAGON_Omaohi( 7, 2)           | 63: Luang_Namtha( 282, 60)        |
| 20: DRAGON_Mt_Haruna( 2, 0)        | 64: Dongsha_Island( 219, 85)      |
| 21: DRAGON_Takayama( 31, 12)       | 65: Doi_Ang_Khang( 436, 210)      |
| 22: DRAGON_Matsumoto( 377, 301)    | 66: Chiang_Dao( 576, 145)         |
| 23: TGF_Tsukuba( 215, 174)         | 67: Chiang_Mai_Met_Stat( 806, 0)  |
| 24: DRAGON_Sava( 10, 6)            | 68: Nong_Khai( 604, 266)          |
| 25: DRAGON_Minowa( 74, 49)         | 69: Ubon_Ratchathani( 1, 0)       |
| 26: DRAGON_Ina( 71, 51)            | 70: Manila_Observatory( 28, 0)    |
| 27: DRAGON_Kofu( 301, 223)         | 71: Sibakom_Univ( 530, 180)       |
| 28: Chiba_University( 471, 336)    | 72: Bangkok( 256, 0)              |
| 29: KORUS_UNIST_Ulsan(1245, 861)   | 73: Sra_Kaeo( 397, 0)             |
| 30: DRAGON_Iida( 72, 35)           | 74: Chachoengsao( 321, 0)         |
| 31: Gwangju_GIST( 603, 0)          | 75: Tai_Ping( 50, 9)              |
| 32: Osaka( 883, 0)                 | 76: Bac_Liut( 236, 24)            |
| 33: Shirahama( 574, 0)             | 77: Songkhla_Met_Stat( 110, 0)    |
| 34: Fukuoka(1002, 515)             | 78: ND_Marbel_Univ( 281, 0)       |
| 35: Gosan_NIMS_SNU( 148, 94)       | 79: Sibakom_Penang( 350, 98)      |
| 36: Gosan_SNU( 295, 101)           | 80: Singapore( 413, 64)           |
| 37: Fukue( 241, 129)               | 81: Pontanak( 780, 133)           |
| 38: Lahore( 842, 629)              | 82: Bukit_Kototabang( 283, 59)    |
| 39: IT_Delhi( 579, 458)            | 83: Sorong( 166, 20)              |
| 40: QOMS_CAS( 326, 0)              | 84: Jambi( 222, 3)                |
| 41: Amity_Univ_Gurgaon( 586, 0)    | 85: BMKG_GAW_PALU( 130, 10)       |
| 42: Pokhara( 399, 249)             | 86: Palangkaraya( 400, 33)        |
| 43: CIMCD( 107, 77)                | 87: Makassar( 130, 8)             |
| 44: Dibrugarh_Univ( 473, 301)      |                                   |

790

791 **Figure 6: AERONET sites used for the GEMS AOD and SSA validation. The red color indicates the site where validation points**  
 792 **exist for both AOD and SSA. The blue color indicates the site where validation points exist only for AOD. The list of station names**  
 793 **in conjunction with the number of AERONET AOD and SSA data points for validation at each station.**

794

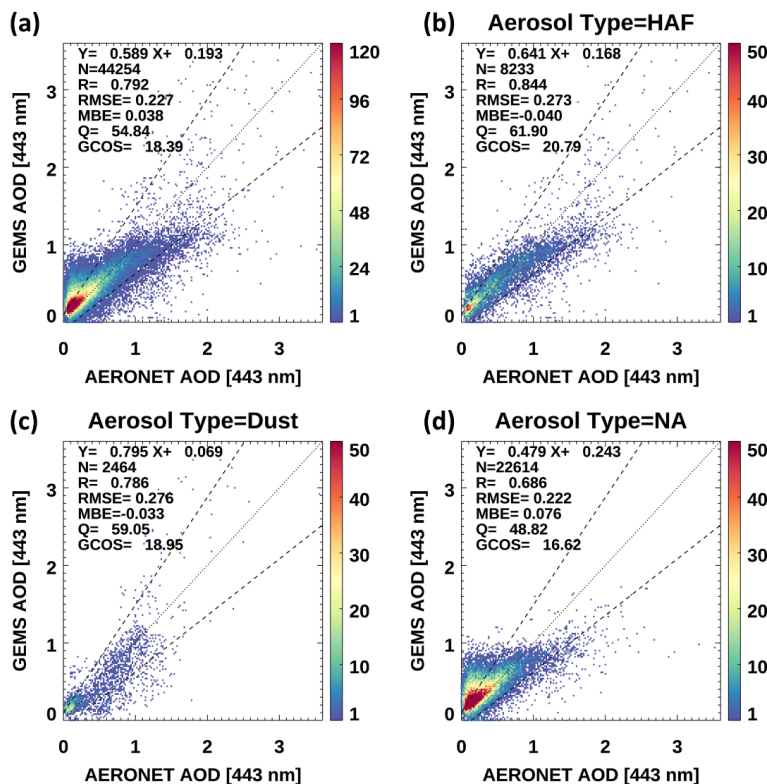

795

796 **Figure 7: Comparison of GEMS and AERONET AOD for (a) total and individual aerosol types: (b) HAF, (c) dust, and (d) NA. The**  
 797 **dashed lines indicate an uncertainty envelope of maximum (0.1 or 30%) in AOD. The dotted lines represent the 1:1 line. Data from**  
 798 **November 1, 2021 to October 31, 2022 are used for comparison.**



799

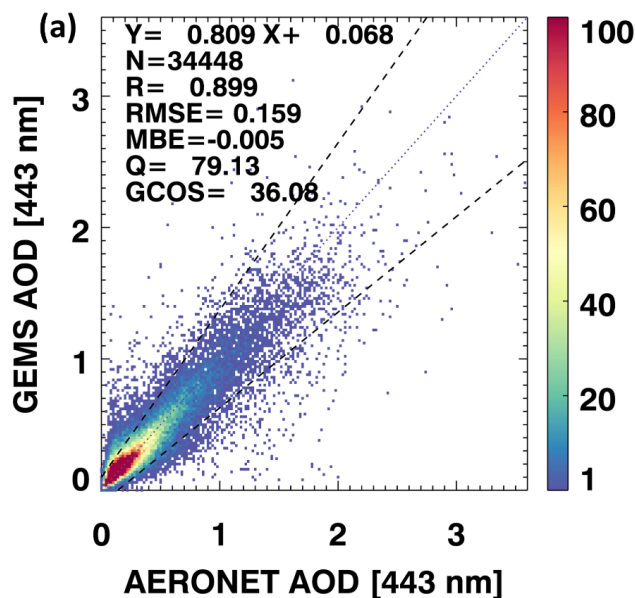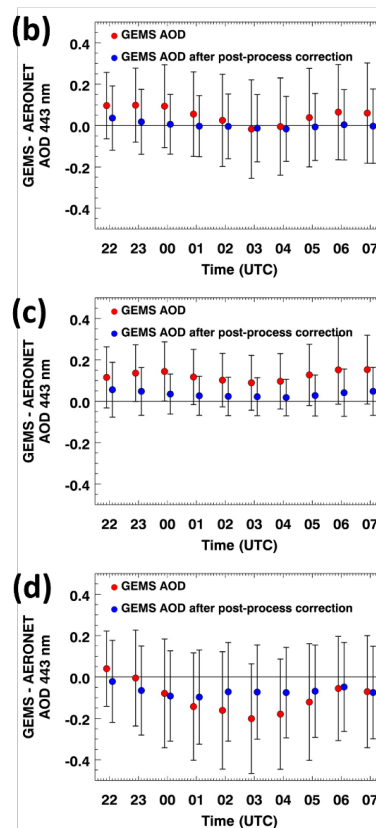

800

801 Figure 8: (a) Comparison of GEMS AOD after post-process correction by machine learning and AERONET AOD. The dashed  
802 lines indicate an uncertainty envelope of a larger 0.1 or  $\pm 30\%$  in AOD. The dotted lines represent the 1:1 line. The difference  
803 between GEMS AOD and AERONET AOD in terms of time. (b) All pixels, (c) pixels when AERONET AOD < 0.4, and (d) pixels  
804 when AERONET AOD > 0.4. The red circles represent the GEMS AOD, and the blue circles represent the GEMS AOD after post-  
805 process correction. The error bars correspond to the standard deviation. Data from December 1, 2021 to October 31, 2022 are used  
806 for comparison.

807

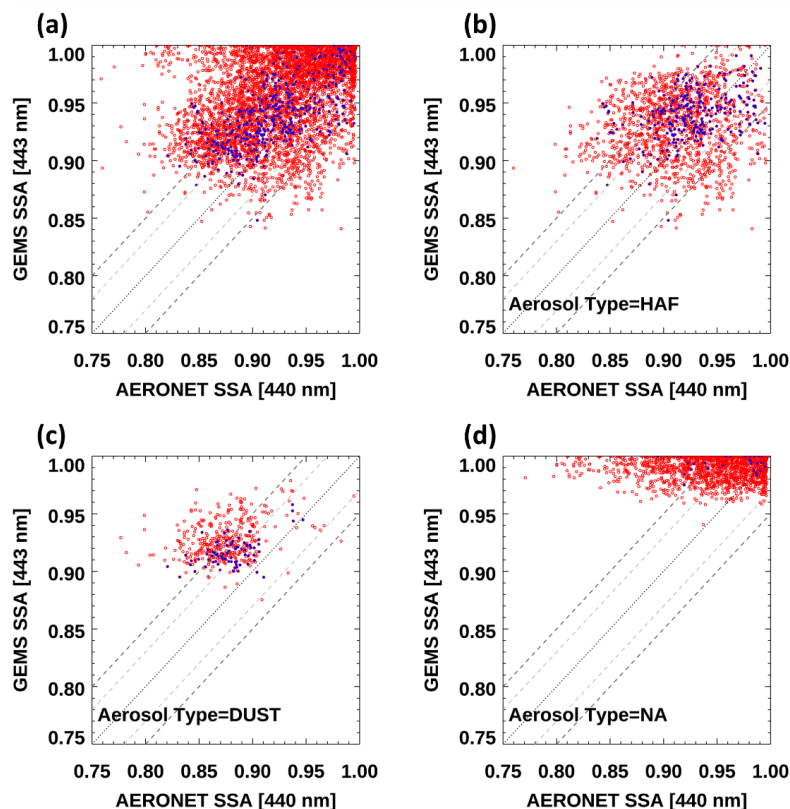

808

809 **Figure 9: Comparison of GEMS and AERONET SSA for (a) total and individual aerosol types: (b) HAF, (c) dust, and (d) NA. The**  
 810 **red circles represent the pixels when AOD > 0.4, and the blue circles represent the pixels when AOD > 1.0. The gray dashed lines**  
 811 **indicate an uncertainty envelope of ±0.03 in SSA, the black dashed lines indicate an uncertainty envelope of ±0.05 in SSA, and the**  
 812 **dotted lines represent the 1:1 line. Data from November 1, 2021 to October 31, 2022 are used for comparison.**

813

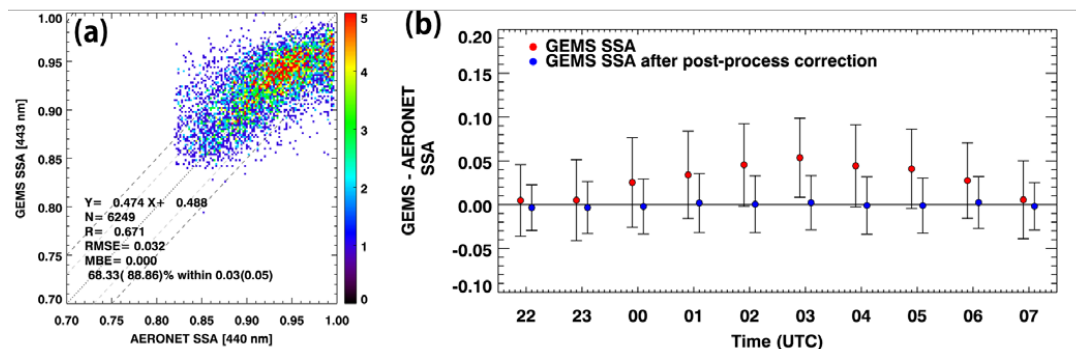

814

815 **Figure 10: (a) Comparison of GEMS SSA after post-process correction and AERONET SSA. The gray dashed lines indicate an**  
 816 **uncertainty envelope of ±0.03 in SSA, the black dashed lines indicate an uncertainty envelope of ±0.05 in SSA, and the dotted lines**  
 817 **represent the 1:1 line. (b) The difference between GEMS and AERONET SSA in terms of time. Data from December 1, 2021 to**  
 818 **October 31, 2022 are used for comparison.**

819

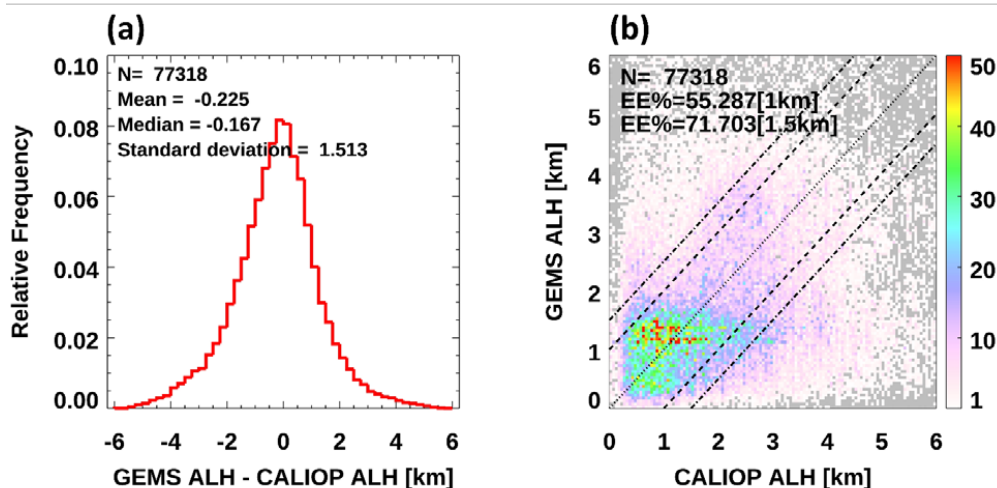

820

821 **Figure 11:** (a) Histogram of difference between GEMS and CALIOP ALH and (b) comparison of GEMS and CALIOP ALH. The  
 822 dashed lines indicate an uncertainty envelope of  $\pm 1$  km in ALH. The dash-dotted lines indicate an uncertainty envelope of  $\pm 1.5$  km  
 823 in ALH. The dotted lines represent the 1:1 line. Data from November 1, 2021 to October 31, 2022 are used for comparison.

824

825 **Table 1: Dimension of LUT in GEMS Aerosol algorithm.**

| Variable Name [Unit]       | Number of Entries | Entries                                                                                                                |
|----------------------------|-------------------|------------------------------------------------------------------------------------------------------------------------|
| Wavelength [nm]            | 6                 | 354, 388, 412, 443, 477, 490                                                                                           |
| SZA [°]                    | 12                | 0.01, 5, 10, 15, 20, 27, 34, 41, 48, 55, 62, 69                                                                        |
| VZA [°]                    | 12                | 0.01, 5, 10, 15, 20, 27, 34, 41, 48, 55, 62, 69                                                                        |
| RAA [°]                    | 11                | 0.01, 15, 30, 45, 60, 80, 100, 120, 140, 160, 180                                                                      |
| Surface reflectance [-]    | 4                 | 0.0, 0.05, 0.1, 0.2                                                                                                    |
| AOD at 443 nm [-]          | 8                 | 0.0, 0.1, 0.4, 0.8, 1.5, 2.0, 2.8, 3.6, 5.0, 10.0                                                                      |
| SSA at 443 nm [-]          | 8                 | 1.0, 0.98, 0.96, 0.94, 0.91, 0.88, 0.85, 0.82 for HAF and Dust<br>1.0, 0.99, 0.98, 0.97, 0.96, 0.94, 0.92, 0.90 for NA |
| ALH above the surface [km] | 5                 | 0.5, 1.5, 3.0, 4.5, 6.0                                                                                                |
| Elevation [km]             | 3                 | 0, 3, 6                                                                                                                |

826

827 **Table 2: Statistic of hourly comparison of GEMS and AERONET AOD in Figure S2.**

| Time  | N    | Slope | y-intercept | R     | RMSE  | MBE    | Q (%) | GCOS (%) |
|-------|------|-------|-------------|-------|-------|--------|-------|----------|
| 22:45 | 925  | 0.730 | 0.180       | 0.715 | 0.188 | 0.100  | 58.38 | 23.24    |
| 23:45 | 1964 | 0.684 | 0.190       | 0.830 | 0.212 | 0.076  | 59.32 | 20.93    |
| 00:45 | 4593 | 0.584 | 0.217       | 0.767 | 0.224 | 0.088  | 51.32 | 16.74    |
| 01:45 | 5632 | 0.534 | 0.200       | 0.774 | 0.211 | 0.054  | 54.83 | 17.47    |
| 02:45 | 6400 | 0.555 | 0.183       | 0.795 | 0.221 | 0.029  | 54.53 | 18.55    |
| 03:45 | 6139 | 0.569 | 0.165       | 0.824 | 0.233 | -0.013 | 56.54 | 17.04    |
| 04:45 | 6157 | 0.593 | 0.169       | 0.822 | 0.230 | 0.000  | 55.19 | 18.16    |
| 05:45 | 5642 | 0.586 | 0.204       | 0.773 | 0.235 | 0.041  | 52.87 | 19.25    |
| 06:45 | 4261 | 0.647 | 0.218       | 0.794 | 0.233 | 0.065  | 54.89 | 19.46    |
| 07:45 | 2541 | 0.617 | 0.224       | 0.771 | 0.247 | 0.054  | 56.55 | 19.48    |

828

829

830



831 **Table 3: Comparison of GEMS and AERONET SSA for different aerosol types in Figure 9. N represents the number of data, and**  
 832 **EE% denotes the percentage within the expected error range of  $\pm 0.03$  ( $\pm 0.05$ ).**

| Aerosol Type | GEMS AOD > 0.4 |                               | GEMS AOD > 1.0 |                               |
|--------------|----------------|-------------------------------|----------------|-------------------------------|
|              | N              | EE% $\pm 0.03$ ( $\pm 0.05$ ) | N              | EE% $\pm 0.03$ ( $\pm 0.05$ ) |
| All          | 5227           | 42.76(67.25)                  | 454            | 56.61(83.70)                  |
| HAF          | 1559           | 41.95(70.24)                  | 277            | 61.01(87.73)                  |
| Dust         | 437            | 20.37(50.57)                  | 82             | 39.02(73.17)                  |
| NA           | 1850           | 45.14(65.62)                  | 31             | 51.61(70.97)                  |

833

834 **Table 4: Statistic of comparison of GEMS and AERONET SSA in Figure S4.**

| Time  | GEMS AOD > 0.4 |                               | GEMS AOD > 1.0 |                               |
|-------|----------------|-------------------------------|----------------|-------------------------------|
|       | N              | EE% $\pm 0.03$ ( $\pm 0.05$ ) | N              | EE% $\pm 0.03$ ( $\pm 0.05$ ) |
| 22:45 | 137            | 64.96 (86.13)                 | 23             | 52.17 (86.96)                 |
| 23:45 | 288            | 60.76 (83.68)                 | 67             | 74.63 (92.54)                 |
| 00:45 | 420            | 57.62 (82.38)                 | 93             | 73.12 (88.17)                 |
| 01:45 | 454            | 56.61 (79.07)                 | 113            | 63.72 (88.50)                 |
| 02:45 | 655            | 39.69 (62.90)                 | 237            | 45.99 (73.00)                 |
| 03:45 | 859            | 27.82 (53.20)                 | 339            | 25.07 (57.23)                 |
| 04:45 | 822            | 28.22 (55.60)                 | 335            | 27.76 (62.39)                 |
| 05:45 | 621            | 36.88 (63.12)                 | 222            | 38.29 (67.57)                 |
| 06:45 | 620            | 48.23 (73.23)                 | 255            | 51.37 (77.65)                 |
| 07:45 | 351            | 60.68 (79.49)                 | 160            | 63.12 (84.38)                 |

835
